# Supplementary material
Source: HighWire-hosted journal article supplement (https://bmjopen.bmj.com/content/8/10/e023902)
Supplement: inline-supplementary-material-1 [file inline-supplementary-material-1.pdf]

## **SUPPLEMENTARY FILES**

### **APPENDICES**

To provide additional information regarding: *Evaluating Comparative Effectiveness of Psychosocial Interventions for Persons Receiving Opioid Agonist Therapy for Opioid Use Disorder: Protocol for a Systematic Review*. Rice DB, Hutton B, Poulin P, Sproule BA, Wolfe D, Moher D, Thavorn K, Garber G, Taha S, Porath A, Willows A, Esmaeilisaraji L, Yazadi F, Skidmore B, Corace K.

- Appendix 1: Literature Search Strategy
- Appendix 2: PRISMA-P Checklist
- Appendix 3: Definitions of Interventions and Comparators

## Appendix 1. PRISMA-P Checklist

| Section/topic                     | #  | Checklist item                                                                                                                                                                                  | Information reported                |                                     | Page # |  |  |  |
|-----------------------------------|----|-------------------------------------------------------------------------------------------------------------------------------------------------------------------------------------------------|-------------------------------------|-------------------------------------|--------|--|--|--|
|                                   |    |                                                                                                                                                                                                 | Yes                                 | No                                  |        |  |  |  |
| <b>ADMINISTRATIVE INFORMATION</b> |    |                                                                                                                                                                                                 |                                     |                                     |        |  |  |  |
| <b>Title</b>                      |    |                                                                                                                                                                                                 |                                     |                                     |        |  |  |  |
| Identification                    | 1a | Identify the report as a protocol of a systematic review                                                                                                                                        | <input checked="" type="checkbox"/> | <input type="checkbox"/>            | 1      |  |  |  |
| Update                            | 1b | If the protocol is for an update of a previous systematic review, identify as such                                                                                                              | <input type="checkbox"/>            | <input checked="" type="checkbox"/> | N/A    |  |  |  |
| Registration                      | 2  | If registered, provide the name of the registry (e.g., PROSPERO) and registration number in the Abstract                                                                                        | <input checked="" type="checkbox"/> | <input type="checkbox"/>            | 3      |  |  |  |
| <b>Authors</b>                    |    |                                                                                                                                                                                                 |                                     |                                     |        |  |  |  |
| Contact                           | 3a | Provide name, institutional affiliation, and e-mail address of all protocol authors; provide physical mailing address of corresponding author                                                   | <input checked="" type="checkbox"/> | <input type="checkbox"/>            | 1      |  |  |  |
| Contributions                     | 3b | Describe contributions of protocol authors and identify the guarantor of the review                                                                                                             | <input checked="" type="checkbox"/> | <input type="checkbox"/>            | 24     |  |  |  |
| Amendments                        | 4  | If the protocol represents an amendment of a previously completed or published protocol, identify as such and list changes; otherwise, state plan for documenting important protocol amendments | <input type="checkbox"/>            | <input checked="" type="checkbox"/> | N/A    |  |  |  |
| <b>Support</b>                    |    |                                                                                                                                                                                                 |                                     |                                     |        |  |  |  |
| Sources                           | 5a | Indicate sources of financial or other support for the review                                                                                                                                   | <input checked="" type="checkbox"/> | <input type="checkbox"/>            | 24     |  |  |  |
| Sponsor                           | 5b | Provide name for the review funder and/or sponsor                                                                                                                                               | <input checked="" type="checkbox"/> | <input type="checkbox"/>            | 24     |  |  |  |
| Role of sponsor/funder            | 5c | Describe roles of funder(s), sponsor(s), and/or institution(s), if any, in developing the protocol                                                                                              | <input checked="" type="checkbox"/> | <input type="checkbox"/>            | 24     |  |  |  |
| <b>INTRODUCTION</b>               |    |                                                                                                                                                                                                 |                                     |                                     |        |  |  |  |
| Rationale                         | 6  | Describe the rationale for the review in the context of what is already known                                                                                                                   | <input checked="" type="checkbox"/> | <input type="checkbox"/>            | 6-7    |  |  |  |
| Objectives                        | 7  | Provide an explicit statement of the question(s) the review will address with reference to participants, interventions, comparators, and outcomes (PICO)                                        | <input checked="" type="checkbox"/> | <input type="checkbox"/>            | 7      |  |  |  |
| <b>METHODS</b>                    |    |                                                                                                                                                                                                 |                                     |                                     |        |  |  |  |
| Eligibility criteria              | 8  | Specify the study characteristics (e.g., PICO, study design, setting, time frame) and report characteristics (e.g., years considered, language, publication status) to be used as               | <input checked="" type="checkbox"/> | <input type="checkbox"/>            | 8-10   |  |  |  |

| Section/topic                      | #   | Checklist item                                                                                                                                                                                                                              | Information reported                |                          | Page #              |
|------------------------------------|-----|---------------------------------------------------------------------------------------------------------------------------------------------------------------------------------------------------------------------------------------------|-------------------------------------|--------------------------|---------------------|
|                                    |     |                                                                                                                                                                                                                                             | Yes                                 | No                       |                     |
|                                    |     | criteria for eligibility for the review                                                                                                                                                                                                     |                                     |                          |                     |
| Information sources                | 9   | Describe all intended information sources (e.g., electronic databases, contact with study authors, trial registers, or other grey literature sources) with planned dates of coverage                                                        | <input checked="" type="checkbox"/> | <input type="checkbox"/> | 8                   |
| Search strategy                    | 10  | Present draft of search strategy to be used for at least one electronic database, including planned limits, such that it could be repeated                                                                                                  | <input checked="" type="checkbox"/> | <input type="checkbox"/> | Additional file 1.2 |
| <b>STUDY RECORDS</b>               |     |                                                                                                                                                                                                                                             |                                     |                          |                     |
| Data management                    | 11a | Describe the mechanism(s) that will be used to manage records and data throughout the review                                                                                                                                                | <input checked="" type="checkbox"/> | <input type="checkbox"/> | 10-11               |
| Selection process                  | 11b | State the process that will be used for selecting studies (e.g., two independent reviewers) through each phase of the review (i.e., screening, eligibility, and inclusion in meta-analysis)                                                 | <input checked="" type="checkbox"/> | <input type="checkbox"/> | 10-11               |
| Data collection process            | 11c | Describe planned method of extracting data from reports (e.g., piloting forms, done independently, in duplicate), any processes for obtaining and confirming data from investigators                                                        | <input checked="" type="checkbox"/> | <input type="checkbox"/> | 11-12               |
| Data items                         | 12  | List and define all variables for which data will be sought (e.g., PICO items, funding sources), any pre-planned data assumptions and simplifications                                                                                       | <input checked="" type="checkbox"/> | <input type="checkbox"/> | 11-12               |
| Outcomes and prioritization        | 13  | List and define all outcomes for which data will be sought, including prioritization of main and additional outcomes, with rationale                                                                                                        | <input checked="" type="checkbox"/> | <input type="checkbox"/> | 11-12               |
| Risk of bias in individual studies | 14  | Describe anticipated methods for assessing risk of bias of individual studies, including whether this will be done at the outcome or study level, or both; state how this information will be used in data synthesis                        | <input checked="" type="checkbox"/> | <input type="checkbox"/> | 12                  |
| <b>DATA</b>                        |     |                                                                                                                                                                                                                                             |                                     |                          |                     |
| Synthesis                          | 15a | Describe criteria under which study data will be quantitatively synthesized                                                                                                                                                                 | <input checked="" type="checkbox"/> | <input type="checkbox"/> | 12-13               |
|                                    | 15b | If data are appropriate for quantitative synthesis, describe planned summary measures, methods of handling data, and methods of combining data from studies, including any planned exploration of consistency (e.g., $I^2$ , Kendall's tau) | <input checked="" type="checkbox"/> | <input type="checkbox"/> | 13                  |
|                                    | 15c | Describe any proposed additional analyses (e.g., sensitivity or subgroup analyses, meta-regression)                                                                                                                                         | <input checked="" type="checkbox"/> | <input type="checkbox"/> | 14-15               |

| Section/topic                            | #   | Checklist item                                                                                                              | Information reported                |                                     | Page # |
|------------------------------------------|-----|-----------------------------------------------------------------------------------------------------------------------------|-------------------------------------|-------------------------------------|--------|
|                                          |     |                                                                                                                             | Yes                                 | No                                  |        |
|                                          | 15d | If quantitative synthesis is not appropriate, describe the type of summary planned                                          | <input checked="" type="checkbox"/> | <input type="checkbox"/>            | 15     |
| <b>Meta-bias(es)</b>                     | 16  | Specify any planned assessment of meta-bias(es) (e.g., publication bias across studies, selective reporting within studies) | <input checked="" type="checkbox"/> | <input type="checkbox"/>            | 13     |
| <b>Confidence in cumulative evidence</b> | 17  | Describe how the strength of the body of evidence will be assessed (e.g., GRADE)                                            | <input type="checkbox"/>            | <input checked="" type="checkbox"/> | N/A    |

## Appendix 2: Literature Search Strategy

### Reviews

2018 Feb 28

Database: Embase Classic+Embase <1947 to 2018 February 27>, Ovid MEDLINE(R) ALL <1946 to February 27, 2018>, PsycINFO <1806 to February Week 3 2018>

Search Strategy:

- 
- 1 Opiate Substitution Treatment/ (3597)
  - 2 ((narcotic\* or opioid\* or opiate\*) adj3 (maintenance\* or substitut\* or replac\*)).tw,kf. (6670)
  - 3 ((narcotic\* or opioid\* or opiate\*) adj3 (decreas\* or detoxif\* or discontinu\* or reduc\* or taper\* or wean\* or withdraw\*)).tw,kf. (22039)
  - 4 ((opiate\* agonist\* or opioid\* agonist\* or opiate\* receptor\* or opioid\* receptor\*) adj3 (maintenance\* or substitut\* or replac\* or rehabilit\* or detox\* or therap\* or pharmacotherap\* or pharmaco-therap\* or treatment\* or abuse-deterren\*)).tw,kf. (2045)
  - 5 ((opiate\* agonist\* or opioid\* agonist\* or opiate\* receptor\* or opioid\* receptor\*) adj3 (decreas\* or detoxif\* or discontinu\* or reduc\* or taper\* or wean\* or withdraw\*)).tw,kf. (2050)
  - 6 or/1-5 [OPIATE SUBSTITUTION TREATMENT] (31773)
  - 7 Substance-Related Disorders/ (113262)
  - 8 Substance Abuse, Intravenous/ (63332)
  - 9 Substance Abuse, Oral/ [NEW MESH 2018] (0)
  - 10 exp Opioid-Related Disorders/ (36965)
  - 11 ((narcotic\* or opioid\* or opiate\*) adj3 (abus\* or addict\* or dependen\* or disorder? or habituat\* or misus\* or mis-us\* or non-medical\* or nonmedical\* or non-prescrib\* or nonprescrib\* or non-prescription\* or nonprescription\* or withdrawal\* or (("use" or used or uses or using) adj2 (illicit\* or illegal\*))))).tw,kf. (45619)
  - 12 ((drug? or substance?) adj3 (abus\* or addict\* or dependen\* or disorder? or habituat\* or misus\* or mis-us\* or "non-medical use?" or "nonmedical use?" or "non-prescribed use?" or "nonprescribed use?" or "non-prescription use?" or "nonprescription use?" or (("use" or used or uses or using) adj2 (illicit\* or illegal\*))))).tw,kf. (310916)
  - 13 (heroin\* adj3 (abus\* or addict\* or dependen\* or disorder? or habituat\* or misus\* or mis-us\* or non-medical\* or nonmedical\* or non-prescrib\* or nonprescrib\* or non-prescription\* or nonprescription\* or withdrawal\* or (("use" or used or uses or using) adj2 (illicit\* or illegal\*))))).tw,kf. (16203)
  - 14 ((hydrocodone or bekadid\$2 or codinovo\$2 or dico\$2 or dicodid\$2 or dihydrocodeinone\$2 or hycodan\$2 or hycon\$2 or hydrocodeinonebitartrate\$2 or hydrocodon\$2 or hydrocon\$2 or hydrocodonum\$2 or robidone\$2) adj3 (abus\* or addict\* or dependen\* or disorder? or habituat\* or misus\* or mis-us\* or non-medical\* or nonmedical\* or non-prescrib\* or nonprescrib\* or non-prescription\* or nonprescription\* or withdrawal\* or (("use" or used or uses or using) adj2 (illicit\* or illegal\*))))).tw,kf. (141)
  - 15 ((fentanyl or alfentanil\$2 or alfenta\$2 or alfentanyl\$2 or beta hydroxymefentanyl or brifentanil\$2 or carfentanil\$2 or duragesic\$2 or fanaxal\$2 or fentanest\$2 or fentora\$2 or hypnorm\$2 or limifen\$2 or lofentanil\$2 or mefentanil\$2 or mirfentanil\$2 or ocfentanil\$2 or phentanyl\$2 or R-39209 or R-4263 or rapifen\$2 or remifentanil\$2 or sublimaze\$2 or sufenta\$2 or sufentanil\$2 or sulfentanil\$2 or trefentanil\$2) adj3 (abus\* or addict\* or dependen\* or disorder? or habituat\* or misus\* or mis-us\* or non-medical\* or nonmedical\* or non-prescrib\* or nonprescrib\* or non-prescription\* or nonprescription\* or withdrawal\* or (("use" or used or uses or using) adj2 (illicit\* or illegal\*))))).tw,kf. (659)
  - 16 ((morphine or anpec\$2 or duramorph\$2 or epimorph\$2 or miro\$2 or morfin\$2 or morfine\$2 or morphin\$2 or morphinium\$2 or morphium\$2 or MS contin or morphia\$2 or opso\$2 or oramorph\$2 or

SDZ 202-250 or SDZ202-250 or skenan\$2 or transmorphine\$2 or trans-morphine\$2) adj3 (abus\* or addict\* or dependen\* or disorder? or habituat\* or misus\* or mis-us\* or non-medical\* or nonmedical\* or non-prescrib\* or nonprescrib\* or non-prescription\* or nonprescription\* or withdrawal\* or ("use" or used or uses or using) adj2 (illicit\* or illegal\*))).tw,kf. (12011)

17 ((oxycodone or bionine\$2 or bionone\$2 or bolodorm\$2 or broncodal\$2 or bucodal\$2 or cafacodal\$2 or cardanon\$2 or codenon\$2 or codix 5 or "col 003" or col003 or DETERx\$2 or dihydrohydroxycodone or dihydrohydroxydodeinone or dihydron\$2 or dinarkon\$2 or endone\$2 or eubine\$2 or eucodal\$2 or eucodale\$2 or eucodalum\$2 or eudin\$2 or eukdin\$2 or eukodal\$2 or eumorphal\$2 or eurodamine\$2 or eutagen\$2 or hydrocodal\$2 or hydroxycodone\$2 or ludonal\$2 or m-oxy or medicodal\$2 or narcobasina\$2 or narcobasine\$2 or narcosin\$2 or nargenol\$2 or narodal\$2 or nsc 19043 or nucodan\$2 or opton\$2 or ossicodone\$2 or oxanest\$2 or oxaydo\$2 or oxepta\$2 or oxicone\$2 or oxicontin\$2 or oxiconum\$2 or oxikon\$2 or oxy ir or oxycod\$2 or oxycodone\$2 or oxycodonehydrochloride or oxycodone hydrochloride or oxycodonehydrochlorid or oxycodyl\$2 or oxycone\$2 or oxycontin\$2 or oxydose\$2 or oxyfast\$2 or oxygesic\$2 or oxyir\$2 or oxykon\$2 or oxynorm\$2 or pancodine\$2 or pavinal\$2 or percolone\$2 or pronarcin\$2 or remoxy\$2 or roxicodone\$2 or roxicodone\$2 or sinthiodal\$2 or stupenal\$2 or supeudol\$2 or tebodal\$2 or tekodin\$2 or thecodin\$2 or thecodin\$2 or xtampa\$2 or xtampza\$2) adj3 (abus\* or addict\* or dependen\* or disorder? or habituat\* or misus\* or mis-us\* or non-medical\* or nonmedical\* or non-prescrib\* or nonprescrib\* or non-prescription\* or nonprescription\* or withdrawal\* or ("use" or used or uses or using) adj2 (illicit\* or illegal\*))).tw,kf. (557)

18 or/7-17 [OPIOID USE DISORDERS] (459104)

19 Substance-Related Disorders/dt [drug therapy] (3838)

20 Substance-Related Disorders/rh [rehabilitation] (10041)

21 Substance Abuse, Intravenous/dt [drug therapy] (326)

22 Substance Abuse, Intravenous/rh [rehabilitation] (1403)

23 Substance Abuse, Oral/dt [drug therapy] (0)

24 Substance Abuse, Oral/rh [rehabilitation] (0)

25 exp Opioid-Related Disorders/dt [drug therapy] (8615)

26 exp Opioid-Related Disorders/rh [rehabilitation] (6399)

27 Analgesics, Opioid/tu [therapeutic use] (13587)

28 (OAT or OATs).tw,kf. (19631)

29 exp Buprenorphine/tu [therapeutic use] (2072)

30 Heroin/tu [therapeutic use] (388)

31 Hydromorphone/tu [therapeutic use] (283)

32 exp Methadone/tu [therapeutic use] (6498)

33 Morphine/tu [therapeutic use] (5142)

34 exp Naloxone/tu [therapeutic use] (4398)

35 ((buprenorphine or anorfin\$2 or belbuca\$2 or buprenex\$2 or buprex\$2 or buprine\$2 or butrans\$2 or finibron\$2 or lepetan\$2 or nih 8805 or nih8805 or norphin\$2 or pentorel\$2 or prefin\$2 or probuphine\$2 or rx 6029 m or rx 6029m or rx6029m or subutex\$2 or temgesic\$2 or transtec\$2 or um 952 or um952) adj3 (maintenance\* or substitut\* or replac\* or rehabilit\* or detox\* or therap\* or pharmacotherap\* or pharmaco-therap\* or treatment\* or abuse-deterren\*))).tw,kf. (4468)

36 ((buprenorphine-naloxone or naloxone-buprenorphine or suboxone\$2 or zubsolv\$2) adj3 (maintenance\* or substitut\* or replac\* or rehabilit\* or detox\* or therap\* or pharmacotherap\* or pharmaco-therap\* or treatment\* or abuse-deterren\*))).tw,kf. (719)

37 ((heroin\* or diacetyl morphine or diacetylmorphine or diamorphine or diaphorin\$2 or morphacetin\$2) adj3 (maintenance\* or substitut\* or replac\* or rehabilit\* or detox\* or therap\* or pharmacotherap\* or pharmaco-therap\* or treatment\* or abuse-deterren\*))).tw,kf. (5354)

38 ((hydromorphon\* or biomorphyl\$2 or cofalaudid\$2 or dihydromorphinon\* or dihydromorphon\* or diladid\$2 or dilaudid\$2 or dimorphon\* or dolonovag\$2 or exalgo\$2 or hydal\$2 or hydromorph contin\$2 or hydromorphinone\$2 or hydrostat\$2 or hymorphan\$2 or jurnista\$2 or laudaconum\$2 or novolaudon\$2

or opidol\$2 or paliadon retardkaps\$2 or palladon\$2 or rexaphon\$2 or semcox\$2 or sophidone\$2) adj3 (maintenance\* or substitut\* or replac\* or rehabilit\* or detox\* or therap\* or pharmacotherap\* or pharmaco-therap\* or treatment\* or abuse-deterren\*).tw,kf. (864)

39 ((methadone or adanon\$2 or adanon hydrochloride\$2 or algidon\$2 or algolysin\$2 or algoxale\$2 or althos\$2 or althos hydrochloride\$2 or amidon\$2 or amidona\$2 or amidone\$2 or amidosan\$2 or an 148 or an148 or anadon\$2 or biodone\$2 or butalgin\$2 or deamin\$2 or depidol\$2 or diaminon\$2 or dianone\$2 or dolafin\$2 or dolamid\$2 or dolesone\$2 or dolmed\$2 or dolophine\$2 or dolophine hydrochloride\$2 or dorex\$2 or dorexol\$2 or eptadone\$2 or fenadon\$2 or gobbidona\$2 or heptadon\$2 or heptanon\$2 or hoe 10820 or hoe10820 or ketalgin\$2 or l polamidon\$2 or mecodin\$2 or mepecton\$2 or mephenon\$2 or metadol\$2 or metadon\$2 or metasedin\$2 or methaddict\$2 or methadose\$2 or methaforte mix\$2 or miadone\$2 or moheptan\$2 or pallidone\$2 or phenadon\$2 or physepton\$2 or physeptone\$2 or polamidon\$2 or polamivet\$2 or polamivit\$2 or sinalgin\$2 or symoron\$2 or westadone\$2) adj3 (maintenance\* or substitut\* or replac\* or rehabilit\* or detox\* or therap\* or pharmacotherap\* or pharmaco-therap\* or treatment\* or abuse-deterren\*).tw,kf. (18855)

40 ((morphine or anpec\$2 or duramorph\$2 or epimorph\$2 or miro\$2 or morfin\$2 or morfine\$2 or morphin\$2 or morphinium\$2 or morphium\$2 or MS contin or morphia\$2 or opso\$2 or oramorph\$2 or SDZ 202-250 or SDZ202-250 or skenan\$2 or transmorphine\$2 or trans-morphine\$2) adj3 (maintenance\* or substitut\* or replac\* or rehabilit\* or detox\* or therap\* or pharmacotherap\* or pharmaco-therap\* or treatment\* or abuse-deterren\*).tw,kf. (9244)

41 ((naloxone or antioplaz\$2 or en 1530 or en 15304 or en1530 or en15304 or evzio\$2 or maloxone\$2 or mapin\$2 or MRZ 2593-Br or MRZ-2593 or nalone\$2 or nalonee\$2 or nalone\$2 or naloxon curamed\$2 or naloxon-ratiopharm\$2 or naloxona\$2 or narkan\$2 or narkanti\$2 or narcon\$2 or narvcam\$2 or naxone\$2 or zynox\$2) adj3 (maintenance\* or substitut\* or replac\* or rehabilit\* or detox\* or therap\* or pharmacotherap\* or pharmaco-therap\* or treatment\* or abuse-deterren\*).tw,kf. (3241)

42 ((naltrexone or antaxon\$2 or antaxone\$2 or celupan\$2 or en 1639a or en1639a or nalerona\$2 or nalorex\$2 or naltrel\$2 or naltrexone hydrochloride\$2 or nemexin\$2 or nodict\$2 or nutrexon\$2 or phaltrexia\$2 or re-via\$2 or regental\$2 or revez\$2 or revia\$2 or trexan\$2 or vivitrex\$2 or vivitrol\$2) adj3 (maintenance\* or substitut\* or replac\* or rehabilit\* or detox\* or therap\* or pharmacotherap\* or pharmaco-therap\* or treatment\* or abuse-deterren\*).tw,kf. (3497)

43 (((drug? adj2 dependen\*) or (drug? adj2 addict\*) or (narcotic\* adj2 dependen\*) or (narcotic\* adj2 addict\*) or (opioid\* adj2 dependen\*) or (opioid\* adj2 addict\*) or (opiate\* adj2 dependen\*) or (opiate\* adj2 addict\*) or (substance? adj2 dependen\*) or (substance? adj2 addict\*)) adj3 (treatment\* or therap\* or pharmacotherap\* or pharmaco-therap\*).tw,kf. (14488)

44 (maintenance\* adj2 (treatment\* or therap\* or pharmacotherap\* or pharmaco-therap\*).tw,kf. (63115)

45 detoxif\*.tw,kf. (81859)

46 or/19-45 [OAT] (237559)

47 18 and 46 (60367)

48 6 or 47 (81175)

49 exp Child/ not (Adolescent/ or exp Adult/) (2424568)

50 exp Infant/ not (Adolescent/ or exp Adult/) (1422345)

51 48 not (49 or 50) [CHILD-/INFANT-ONLY REMOVED] (79535)

52 exp Animals/ not (exp Animals/ and Humans/) (15327571)

53 51 not 52 [ANIMAL-ONLY REMOVED] (61669)

54 (editorial or news or newspaper article).pt. (1210715)

55 53 not 54 [OPINION PIECES REMOVED] (60534)

56 limit 55 to systematic reviews [Limit not valid in Embase; records were retained] (19270)

57 meta analysis.pt. (85285)

58 exp meta-analysis as topic/ (52797)

59 (meta-analy\* or metanaly\* or metaanaly\* or met analy\* or integrative research or integrative review\* or integrative overview\* or research integration or research overview\* or collaborative review\*).tw,kf. (323991)

60 (systematic review\* or systematic overview\* or evidence-based review\* or evidence-based overview\* or (evidence adj3 (review\* or overview\*)) or meta-review\* or meta-overview\* or meta-synthes\* or "review of reviews" or technology assessment\* or HTA or HTAs).tw,kf. (383178)

61 exp Technology assessment, biomedical/ (22830)

62 (cochrane or health technology assessment or evidence report).jw. (38516)

63 (network adj (MA or MAs)).tw,kf. (16)

64 (NMA or NMAs).tw,kf. (3965)

65 indirect\* compar\*.tw,kf. (4355)

66 (indirect treatment\* adj1 compar\*).tw,kf. (556)

67 (mixed treatment\* adj1 compar\*).tw,kf. (1223)

68 (multiple treatment\* adj1 compar\*).tw,kf. (310)

69 (multi-treatment\* adj1 compar\*).tw,kf. (4)

70 simultaneous\* compar\*.tw,kf. (2286)

71 mixed comparison?.tw,kf. (50)

72 or/57-71 (681908)

73 55 and 72 (1668)

74 56 or 73 [REVIEWS] (19584)

75 74 use medall [MEDLINE RECORDS] (1423)

76 drug dependence treatment/ (7884)

77 opiate substitution treatment/ (3597)

78 ((narcotic\* or opioid\* or opiate\*) adj3 (maintenance\* or substitut\* or replac\*)).tw,kw. (6748)

79 ((narcotic\* or opioid\* or opiate\*) adj3 (decreas\* or detoxif\* or discontinu\* or reduc\* or taper\* or wean\* or withdraw\*)).tw,kw. (22166)

80 ((opiate\* agonist\* or opioid\* agonist\* or opiate\* receptor\* or opioid\* receptor\*) adj3 (maintenance\* or substitut\* or replac\* or rehabilit\* or detox\* or therap\* or pharmacotherap\* or pharmaco-therap\* or treatment\* or abuse-deterren\*)).tw,kw. (2071)

81 ((opiate\* agonist\* or opioid\* agonist\* or opiate\* receptor\* or opioid\* receptor\*) adj3 (decreas\* or detoxif\* or discontinu\* or reduc\* or taper\* or wean\* or withdraw\*)).tw,kw. (2056)

82 methadone treatment/ (4159)

83 or/76-82 [OPIATE SUBSTITUTION TREATMENT] (42492)

84 drug dependence/ (137162)

85 substance abuse/ (181603)

86 exp narcotic dependence/ (137914)

87 ((narcotic\* or opioid\* or opiate\*) adj3 (abus\* or addict\* or dependen\* or disorder? or habituat\* or misus\* or mis-us\* or non-medical\* or nonmedical\* or non-prescrib\* or nonprescrib\* or non-prescription\* or nonprescription\* or withdrawal\* or (("use" or used or uses or using) adj2 (illicit\* or illegal\*))))).tw,kw. (46245)

88 ((drug? or substance?) adj3 (abus\* or addict\* or dependen\* or disorder? or habituat\* or misus\* or mis-us\* or "non-medical use?" or "nonmedical use?" or "non-prescribed use?" or "nonprescribed use?" or "non-prescription use?" or "nonprescription use?" or (("use" or used or uses or using) adj2 (illicit\* or illegal\*))))).tw,kw. (314212)

89 (heroin\* adj3 (abus\* or addict\* or dependen\* or disorder? or habituat\* or misus\* or mis-us\* or non-medical\* or nonmedical\* or non-prescrib\* or nonprescrib\* or non-prescription\* or nonprescription\* or withdrawal\* or (("use" or used or uses or using) adj2 (illicit\* or illegal\*))))).tw,kw. (16386)

90 ((hydrocodone or bekadid\$2 or codinovo\$2 or dico\$2 or dicodid\$2 or dihydrocodeinone\$2 or hycodan\$2 or hycon\$2 or hydrocodeinonebitartrate\$2 or hydrocodon\$2 or hydrocon\$2 or hydrocodonum\$2 or robidone\$2) adj3 (abus\* or addict\* or dependen\* or disorder? or habituat\* or misus\* or mis-us\* or non-medical\* or nonmedical\* or non-prescrib\* or nonprescrib\* or non-prescription\* or



nonprescription\* or withdrawal\* or (("use" or used or uses or using) adj2 (illicit\* or illegal\*))).tw,kw. (151)

91 ((fentanyl or alfentanil\$2 or alfenta\$2 or alfentanil\$2 or beta hydroxymefentanyl or brifentanil\$2 or carfentanil\$2 or duragesic\$2 or fanaxal\$2 or fentanest\$2 or fentora\$2 or hypnorm\$2 or limifen\$2 or lofentanil\$2 or mefentanil\$2 or mirfentanil\$2 or ocfentanil\$2 or phentanyl\$2 or R-39209 or R-4263 or rapifen\$2 or remifentanil\$2 or sublimaze\$2 or sufenta\$2 or sufentanil\$2 or sulfentanil\$2 or trefentanil\$2) adj3 (abus\* or addict\* or dependen\* or disorder? or habituat\* or misus\* or mis-us\* or non-medical\* or nonmedical\* or non-prescrib\* or nonprescrib\* or non-prescription\* or nonprescription\* or withdrawal\* or (("use" or used or uses or using) adj2 (illicit\* or illegal\*))).tw,kw. (668)

92 ((morphine or anpec\$2 or duramorph\$2 or epimorph\$2 or miro\$2 or morfin\$2 or morfine\$2 or morphin\$2 or morphinium\$2 or morphium\$2 or MS contin or morphia\$2 or opso\$2 or oramorph\$2 or SDZ 202-250 or SDZ202-250 or skenan\$2 or transmorphine\$2 or trans-morphine\$2) adj3 (abus\* or addict\* or dependen\* or disorder? or habituat\* or misus\* or mis-us\* or non-medical\* or nonmedical\* or non-prescrib\* or nonprescrib\* or non-prescription\* or nonprescription\* or withdrawal\* or (("use" or used or uses or using) adj2 (illicit\* or illegal\*))).tw,kw. (12020)

93 ((oxycodone or bionine\$2 or bionone\$2 or bolodorm\$2 or broncodal\$2 or bucodal\$2 or cafacodal\$2 or cardanon\$2 or codenon\$2 or codix 5 or "col 003" or col003 or DETERx\$2 or dihydrohydroxycodeinone or dihydrohydroxydodeinone or dihydrone\$2 or dinarkon\$2 or endone\$2 or eubine\$2 or eucodal\$2 or eucodale\$2 or eucodalum\$2 or eudin\$2 or eukdin\$2 or eukodal\$2 or eumorphal\$2 or eurodamine\$2 or eutagen\$2 or hydrocodal\$2 or hydroxycodeinoma\$2 or ludonal\$2 or m-oxy or medicodal\$2 or narcobasina\$2 or narcobasine\$2 or narcosin\$2 or nargenol\$2 or narodal\$2 or nsc 19043 or nucodan\$2 or opton\$2 or ossicodone\$2 or oxanest\$2 or oxaydo\$2 or oxecta\$2 or oxicone\$2 or oxicontin\$2 or oxiconum\$2 or oxikon\$2 or oxy ir or oxycod\$2 or oxycodeinon\$2 or oxycodeinonhydrochloride or oxycodone hydrochloride or oxycodonhydrochlorid or oxycodyl\$2 or oxycone\$2 or oxycontin\$2 or oxydose\$2 or oxyfast\$2 or oxygesic\$2 or oxyir\$2 or oxykon\$2 or oxynorm\$2 or pancodine\$2 or pavinal\$2 or percolone\$2 or pronarcin\$2 or remoxy\$2 or roxicodone\$2 or roxicodone\$2 or sinthiodal\$2 or stupenal\$2 or supeudol\$2 or tebodal\$2 or tekodin\$2 or thecodin\$2 or theocodin\$2 or xtampa\$2 or xtampza\$2) adj3 (abus\* or addict\* or dependen\* or disorder? or habituat\* or misus\* or mis-us\* or non-medical\* or nonmedical\* or non-prescrib\* or nonprescrib\* or non-prescription\* or nonprescription\* or withdrawal\* or (("use" or used or uses or using) adj2 (illicit\* or illegal\*))).tw,kw. (580)

94 or/84-93 [OPIOID USE DISORDERS] (557651)

95 drug dependence/dt [Drug Therapy] (6231)

96 drug dependence/rh [Rehabilitation] (10049)

97 substance abuse/dt [Drug Therapy] (2590)

98 substance abuse/rh [Rehabilitation] (9793)

99 exp narcotic dependence/dt (7343)

100 exp narcotic dependence/rh (1424)

101 (OAT or OATs).tw,kw. (19775)

102 ((buprenorphine or anorfin\$2 or belbuca\$2 or buprenex\$2 or buprex\$2 or buprine\$2 or butrans\$2 or finibron\$2 or lepetan\$2 or nih 8805 or nih8805 or norphin\$2 or pentorel\$2 or prefin\$2 or probuphine\$2 or rx 6029 m or rx 6029m or rx6029m or subutex\$2 or temgesic\$2 or transtec\$2 or um 952 or um952) adj3 (maintenance\* or substitut\* or replac\* or rehabilit\* or detox\* or therap\* or pharmacotherap\* or pharmaco-therap\* or treatment\* or abuse-deterren\*))).tw,kw. (4514)

103 ((buprenorphine-naloxone or naloxone-buprenorphine or suboxone\$2 or zubsolv\$2) adj3 (maintenance\* or substitut\* or replac\* or rehabilit\* or detox\* or therap\* or pharmacotherap\* or pharmaco-therap\* or treatment\* or abuse-deterren\*))).tw,kw. (724)

104 ((hydromorphon\* or biomorphyl\$2 or cofalaudid\$2 or dihydromorphinon\* or dihydromorphon\* or diladid\$2 or dilaudid\$2 or dimorphon\* or dolonovag\$2 or exalgo\$2 or hydal\$2 or hydromorph contin\$2 or hydromorphinone\$2 or hydrostat\$2 or hymorphan\$2 or jornista\$2 or laudaconum\$2 or novolaudon\$2 or opidol\$2 or paliadon retardkaps\$2 or palladon\$2 or rexaphon\$2 or semcox\$2 or sophidone\$2) adj3

(maintenance\* or substitut\* or replac\* or rehabilit\* or detox\* or therap\* or pharmacotherap\* or pharmaco-therap\* or treatment\* or abuse-deterren\*).tw,kw. (862)

105 ((heroin\* or diacetyl morphine or diacetylmorphine or diamorphine or diaphorin\$2 or morphacetin\$2) adj3 (maintenance\* or substitut\* or replac\* or rehabilit\* or detox\* or therap\* or pharmacotherap\* or pharmaco-therap\* or treatment\* or abuse-deterren\*).tw,kw. (5404)

106 ((methadone or adanon\$2 or adanon hydrochloride\$2 or algidon\$2 or algolysin\$2 or algoxale\$2 or althose\$2 or althose hydrochloride\$2 or amidon\$2 or amidona\$2 or amidone\$2 or amidosan\$2 or an 148 or an148 or anadon\$2 or biodone\$2 or butalgin\$2 or deamin\$2 or depidol\$2 or diaminon\$2 or dianone\$2 or dolafin\$2 or dolamid\$2 or dolesone\$2 or dolmed\$2 or dolophine\$2 or dolophine hydrochloride\$2 or dorex\$2 or dorexol\$2 or eptadone\$2 or fenadon\$2 or gobbidona\$2 or heptadon\$2 or heptanon\$2 or hoe 10820 or hoe10820 or ketalgin\$2 or l polamidon\$2 or mecodin\$2 or mepecton\$2 or mephenon\$2 or metadol\$2 or metadon\$2 or metasedin\$2 or methaddict\$2 or methadose\$2 or methaforte mix\$2 or miadone\$2 or moheptan\$2 or pallidone\$2 or phenadon\$2 or physepton\$2 or physeptone\$2 or polamidon\$2 or polamivet\$2 or polamivit\$2 or sinalgin\$2 or symoron\$2 or westadone\$2) adj3 (maintenance\* or substitut\* or replac\* or rehabilit\* or detox\* or therap\* or pharmacotherap\* or pharmaco-therap\* or treatment\* or abuse-deterren\*).tw,kw. (18983)

107 ((morphine or anpec\$2 or duramorph\$2 or epimorph\$2 or miro\$2 or morfin\$2 or morfine\$2 or morphin\$2 or morphinium\$2 or morphium\$2 or MS contin or morphia\$2 or opso\$2 or oramorph\$2 or SDZ 202-250 or SDZ202-250 or skenan\$2 or transmorphine\$2 or trans-morphine\$2) adj3 (maintenance\* or substitut\* or replac\* or rehabilit\* or detox\* or therap\* or pharmacotherap\* or pharmaco-therap\* or treatment\* or abuse-deterren\*).tw,kw. (9235)

108 ((naloxone or antioplaz\$2 or en 1530 or en 15304 or en1530 or en15304 or evzio\$2 or maloxone\$2 or mapin\$2 or MRZ 2593-Br or MRZ-2593 or nalone\$2 or nalonee\$2 or nalone\$2 or naloxon curamed\$2 or naloxon-ratiopharm\$2 or naloxona\$2 or narkan\$2 or narcanti\$2 or narcon\$2 or narvcam\$2 or naxone\$2 or zynox\$2) adj3 (maintenance\* or substitut\* or replac\* or rehabilit\* or detox\* or therap\* or pharmacotherap\* or pharmaco-therap\* or treatment\* or abuse-deterren\*).tw,kw. (3250)

109 ((naltrexone or antaxon\$2 or antaxone\$2 or celupan\$2 or en 1639a or en1639a or nalerona\$2 or nalorex\$2 or naltrel\$2 or naltrexone hydrochloride\$2 or nemexin\$2 or nodict\$2 or nutrexon\$2 or phaltrexia\$2 or re-via\$2 or regental\$2 or revez\$2 or revia\$2 or trexan\$2 or vivitrex\$2 or vivitrol\$2) adj3 (maintenance\* or substitut\* or replac\* or rehabilit\* or detox\* or therap\* or pharmacotherap\* or pharmaco-therap\* or treatment\* or abuse-deterren\*).tw,kw. (3523)

110 maintenance therapy/ (33721)

111 (maintenance\* adj2 (treatment\* or therap\* or pharmacotherap\* or pharmaco-therap\*).tw,kw. (63435)

112 (((drug? adj2 dependen\*) or (drug? adj2 addict\*) or (narcotic\* adj2 dependen\*) or (narcotic\* adj2 addict\*) or (opioid\* adj2 dependen\*) or (opioid\* adj2 addict\*) or (opiate\* adj2 dependen\*) or (opiate\* adj2 addict\*) or (substance? adj2 dependen\*) or (substance? adj2 addict\*)) adj3 (treatment\* or therap\* or pharmacotherap\* or pharmaco-therap\*).tw,kw. (14490)

113 detoxif\*.tw,kw. (82730)

114 or/95-113 [OAT] (234039)

115 94 and 114 (61375)

116 83 or 115 [OPIATE SUBSTITUTION TREATMENT/OAT] (89378)

117 exp child/ not (exp adult/ or adolescent/) (2424568)

118 exp infant/ not (exp adult/ or adolescent/) (1422345)

119 fetus/ not (exp adult/ or adolescent/) (233852)

120 or/117-119 (3035843)

121 116 not 120 [CHILD-/INFANT-/FETUS-ONLY REMOVED] (87563)

122 exp animal experimentation/ or exp animal model/ or exp animal experiment/ or nonhuman/ or exp vertebrate/ (46621835)

123 exp human/ or exp human experimentation/ or exp human experiment/ (36368434)

124 122 not 123 (10255103)

125 121 not 124 [ANIMAL-ONLY REMOVED] (76107)  
126 editorial.pt. (1008146)  
127 125 not 126 [OPINION PIECES REMOVED] (75078)  
128 meta-analysis/ (228832)  
129 "systematic review"/ (159939)  
130 "meta analysis (topic)"/ (36507)  
131 (meta-analy\* or metanaly\* or metaanaly\* or met analy\* or integrative research or integrative review\* or integrative overview\* or research integration or research overview\* or collaborative review\*).tw,kw. (326601)  
132 (systematic review\* or systematic overview\* or evidence-based review\* or evidence-based overview\* or (evidence adj3 (review\* or overview\*)) or meta-review\* or meta-overview\* or meta-synthes\* or "review of reviews" or technology assessment\* or HTA or HTAs).tw,kw. (386028)  
133 biomedical technology assessment/ (21723)  
134 (cochrane or health technology assessment or evidence report).jw. (38516)  
135 (network adj (MA or MAs)).tw,kw. (16)  
136 (NMA or NMAs).tw,kw. (3984)  
137 indirect\* compar\*.tw,kw. (4407)  
138 (indirect treatment\* adj1 compar\*).tw,kw. (560)  
139 (mixed treatment\* adj1 compar\*).tw,kw. (1244)  
140 (multiple treatment\* adj1 compar\*).tw,kw. (313)  
141 (multi-treatment\* adj1 compar\*).tw,kw. (4)  
142 simultaneous\* compar\*.tw,kw. (2286)  
143 mixed comparison?.tw,kw. (51)  
144 or/128-143 (734926)  
145 127 and 144 (2446)  
146 127 and 144 [REVIEWS] (2446)  
147 conference abstract.pt. (2898647)  
148 limit 147 to yr="2016-current" (643364)  
149 146 and 148 (54)  
150 146 not 147 [ALL CONFERENCE ABSTRACTS REMOVED] (2298)  
151 149 or 150 [CONFERENCE ABSTRACTS PRIOR TO 2016 REMOVED] (2352)  
152 151 use emczd [EMBASE RECORDS] (1278)  
153 Drug Rehabilitation/ (19847)  
154 ((narcotic\* or opioid\* or opiate\*) adj3 (maintenance\* or substitut\* or replac\*)).tw. (6588)  
155 ((narcotic\* or opioid\* or opiate\*) adj3 (decreas\* or detoxif\* or discontinu\* or reduc\* or taper\* or wean\* or withdraw\*)).tw. (22016)  
156 ((opiate\* agonist\* or opioid\* agonist\* or opiate\* receptor\* or opioid\* receptor\*) adj3 (maintenance\* or substitut\* or replac\* or rehabilit\* or detox\* or therap\* or pharmacotherap\* or pharmaco-therap\* or treatment\* or abuse-deterren\*)).tw. (2032)  
157 ((opiate\* agonist\* or opioid\* agonist\* or opiate\* receptor\* or opioid\* receptor\*) adj3 (decreas\* or detoxif\* or discontinu\* or reduc\* or taper\* or wean\* or withdraw\*)).tw. (2050)  
158 methadone maintenance/ (7582)  
159 or/153-158 [OPIATE SUBSTITUTION TREATMENT] (54279)  
160 exp drug dependency/ (246294)  
161 drug abuse/ (182188)  
162 "substance use disorder"/ (129585)  
163 Intravenous Drug Usage/ (3662)  
164 ((narcotic\* or opioid\* or opiate\*) adj3 (abus\* or addict\* or dependen\* or disorder? or habituat\* or misus\* or mis-us\* or non-medical\* or nonmedical\* or non-prescrib\* or nonprescrib\* or non-prescription\* or nonprescription\* or withdrawal\* or ("use" or used or uses or using) adj2 (illicit\* or illegal\*))).tw. (45414)

165 ((drug? or substance?) adj3 (abus\* or addict\* or dependen\* or disorder? or habituat\* or misus\* or mis-us\* or "non-medical use?" or "nonmedical use?" or "non-prescribed use?" or "nonprescribed use?" or "non-prescription use?" or "nonprescription use?" or (("use" or used or uses or using) adj2 (illicit\* or illegal\*))))).tw. (308416)

166 (heroin\* adj3 (abus\* or addict\* or dependen\* or disorder? or habituat\* or misus\* or mis-us\* or non-medical\* or nonmedical\* or non-prescrib\* or nonprescrib\* or non-prescription\* or nonprescription\* or withdrawal\* or (("use" or used or uses or using) adj2 (illicit\* or illegal\*))))).tw. (16177)

167 ((hydrocodone or bekadid\$2 or codinovo\$2 or dico\$2 or dicodid\$2 or dihydrocodeinone\$2 or hycodan\$2 or hycon\$2 or hydrocodeinonebitartrate\$2 or hydrocodon\$2 or hydrocon\$2 or hydrocodonum\$2 or robidone\$2) adj3 (abus\* or addict\* or dependen\* or disorder? or habituat\* or misus\* or mis-us\* or non-medical\* or nonmedical\* or non-prescrib\* or nonprescrib\* or non-prescription\* or nonprescription\* or withdrawal\* or (("use" or used or uses or using) adj2 (illicit\* or illegal\*))))).tw. (141)

168 ((fentanyl or alfentanil\$2 or alfenta\$2 or alfentanil\$2 or beta hydroxymefentanyl or brifentanil\$2 or carfentanil\$2 or duragesic\$2 or fanaxal\$2 or fentanest\$2 or fentora\$2 or hypnorm\$2 or limifen\$2 or lofentanil\$2 or mefentanil\$2 or mirfentanil\$2 or ocfentanil\$2 or phentanyl\$2 or R-39209 or R-4263 or rapifen\$2 or remifentanil\$2 or sublimaze\$2 or sufenta\$2 or sufentanil\$2 or sulfentanil\$2 or trefentanil\$2) adj3 (abus\* or addict\* or dependen\* or disorder? or habituat\* or misus\* or mis-us\* or non-medical\* or nonmedical\* or non-prescrib\* or nonprescrib\* or non-prescription\* or nonprescription\* or withdrawal\* or (("use" or used or uses or using) adj2 (illicit\* or illegal\*))))).tw. (658)

169 ((morphine or anpec\$2 or duramorph\$2 or epimorph\$2 or miro\$2 or morfin\$2 or morfine\$2 or morphin\$2 or morphinium\$2 or morphium\$2 or MS contin or morphia\$2 or opso\$2 or oramorph\$2 or SDZ 202-250 or SDZ202-250 or skenan\$2 or transmorphine\$2 or trans-morphine\$2) adj3 (abus\* or addict\* or dependen\* or disorder? or habituat\* or misus\* or mis-us\* or non-medical\* or nonmedical\* or non-prescrib\* or nonprescrib\* or non-prescription\* or nonprescription\* or withdrawal\* or (("use" or used or uses or using) adj2 (illicit\* or illegal\*))))).tw. (11916)

170 ((oxycodone or bionine\$2 or bionone\$2 or bolodorm\$2 or broncodal\$2 or bucodal\$2 or cafacodal\$2 or cardanon\$2 or codenon\$2 or codix 5 or "col 003" or col003 or DETERx\$2 or dihydrohydroxycodone or dihydrohydroxydodeinone or dihydrone\$2 or dinarkon\$2 or endone\$2 or eubine\$2 or eucodal\$2 or eucodale\$2 or eucodalum\$2 or eudin\$2 or eukdin\$2 or eukodal\$2 or eumorphal\$2 or eurodamine\$2 or eutagen\$2 or hydrocodal\$2 or hydroxycodone\$2 or ludonal\$2 or m-oxy or medicodal\$2 or narcobasina\$2 or narcobasine\$2 or narcosin\$2 or nargenol\$2 or narodal\$2 or nsc 19043 or nucodan\$2 or opton\$2 or ossicodone\$2 or oxanest\$2 or oxaydo\$2 or oxecta\$2 or oxicone\$2 or oxicontin\$2 or oxiconum\$2 or oxikon\$2 or oxy ir or oxycod\$2 or oxycodone\$2 or oxycodonehydrochloride or oxycodone hydrochloride or oxycodonhydrochlorid or oxycodyl\$2 or oxycone\$2 or oxycontin\$2 or oxydose\$2 or oxyfast\$2 or oxygesic\$2 or oxyir\$2 or oxykon\$2 or oxynorm\$2 or pancodine\$2 or pavinal\$2 or percolone\$2 or pronarcin\$2 or remoxy\$2 or roxicodone\$2 or roxicodone\$2 or sinthiodal\$2 or stupenal\$2 or supeudol\$2 or tebodal\$2 or tekodin\$2 or thecodin\$2 or thecodin\$2 or xtampa\$2 or xtampza\$2) adj3 (abus\* or addict\* or dependen\* or disorder? or habituat\* or misus\* or mis-us\* or non-medical\* or nonmedical\* or non-prescrib\* or nonprescrib\* or non-prescription\* or nonprescription\* or withdrawal\* or (("use" or used or uses or using) adj2 (illicit\* or illegal\*))))).tw. (556)

171 or/160-170 [OPIOID USE DISORDERS] (609718)

172 ((buprenorphine or anorfin\$2 or belbuca\$2 or buprenex\$2 or buprex\$2 or buprine\$2 or butrans\$2 or finibron\$2 or lepetan\$2 or nih 8805 or nih8805 or norphin\$2 or pentorel\$2 or prefin\$2 or probuphine\$2 or rx 6029 m or rx 6029m or rx6029m or subutex\$2 or temgesic\$2 or transtec\$2 or um 952 or um952) adj3 (maintenance\* or substitut\* or replac\* or rehabilit\* or detox\* or therap\* or pharmacotherap\* or pharmaco-therap\* or treatment\* or abuse-deterren\*))).tw. (4467)

173 ((buprenorphine-naloxone or naloxone-buprenorphine or suboxone\$2 or zubsolv\$2) adj3 (maintenance\* or substitut\* or replac\* or rehabilit\* or detox\* or therap\* or pharmacotherap\* or pharmaco-therap\* or treatment\* or abuse-deterren\*))).tw. (719)

174 ((hydromorphon\* or biomorphyl\$2 or cofalaudid\$2 or dihydromorphenon\* or dihydromorphon\* or diladid\$2 or dilaudid\$2 or dimorphon\* or dolonovag\$2 or exalgo\$2 or hydal\$2 or hydromorph contin\$2 or hydromorphenone\$2 or hydrostat\$2 or hymorphan\$2 or jurnista\$2 or laudaconum\$2 or novolaudon\$2 or opidol\$2 or paliadon retardkaps\$2 or palladon\$2 or rexaphon\$2 or semcox\$2 or sophidone\$2) adj3 (maintenance\* or substitut\* or replac\* or rehabilit\* or detox\* or therap\* or pharmacotherap\* or pharmaco-therap\* or treatment\* or abuse-deterren\*)).tw. (857)

175 ((heroin\* or diacetyl morphine or diacetylmorphine or diamorphine or diaphorin\$2 or heroine\$2 or morphacetin\$2) adj3 (maintenance\* or substitut\* or replac\* or rehabilit\* or detox\* or therap\* or pharmacotherap\* or pharmaco-therap\* or treatment\* or abuse-deterren\*)).tw. (5347)

176 ((methadone or adanon\$2 or adanon hydrochloride\$2 or algidon\$2 or algolysin\$2 or algoxale\$2 or althos\$2 or althos hydrochloride\$2 or amidon\$2 or amidona\$2 or amidone\$2 or amidosan\$2 or an 148 or an148 or anadon\$2 or biodone\$2 or butalgin\$2 or deamin\$2 or depidol\$2 or diamidon\$2 or dianone\$2 or dolafin\$2 or dolamid\$2 or dolesone\$2 or dolmed\$2 or dolophine\$2 or dolophine hydrochloride\$2 or dorex\$2 or dorexol\$2 or eptadone\$2 or fenadon\$2 or gobbidona\$2 or heptadon\$2 or heptanon\$2 or hoe 10820 or hoe10820 or ketalgin\$2 or l polamidon\$2 or mecodin\$2 or mepecton\$2 or mephenon\$2 or metadol\$2 or metadon\$2 or metasedin\$2 or methaddict\$2 or methadose\$2 or methaforte mix\$2 or miadone\$2 or moheptan\$2 or pallidone\$2 or phenadon\$2 or physepton\$2 or physeptone\$2 or polamidon\$2 or polamivet\$2 or polamivit\$2 or sinalgin\$2 or symoron\$2 or westadone\$2) adj3 (maintenance\* or substitut\* or replac\* or rehabilit\* or detox\* or therap\* or pharmacotherap\* or pharmaco-therap\* or treatment\* or abuse-deterren\*)).tw. (18825)

177 ((morphine or anpec\$2 or duramorph\$2 or epimorph\$2 or miro\$2 or morfin\$2 or morfine\$2 or morphin\$2 or morphinium\$2 or morphium\$2 or MS contin or morphia\$2 or opso\$2 or oramorph\$2 or SDZ 202-250 or SDZ202-250 or skenan\$2 or transmorphine\$2 or trans-morphine\$2) adj3 (maintenance\* or substitut\* or replac\* or rehabilit\* or detox\* or therap\* or pharmacotherap\* or pharmaco-therap\* or treatment\* or abuse-deterren\*)).tw. (9201)

178 ((naloxone or antioplaz\$2 or en 1530 or en 15304 or en1530 or en15304 or evzio\$2 or maloxone\$2 or mapin\$2 or MRZ 2593-Br or MRZ-2593 or nalone\$2 or nalonee\$2 or nalone\$2 or naloxon curamed\$2 or naloxon-ratiopharm\$2 or naloxona\$2 or narkan\$2 or narkanti\$2 or narcon\$2 or narvcam\$2 or naxone\$2 or zynox\$2) adj3 (maintenance\* or substitut\* or replac\* or rehabilit\* or detox\* or therap\* or pharmacotherap\* or pharmaco-therap\* or treatment\* or abuse-deterren\*)).tw. (3241)

179 ((naltrexone or antaxon\$2 or antaxone\$2 or celupan\$2 or en 1639a or en1639a or nalerona\$2 or nalorex\$2 or naltrel\$2 or naltrexone hydrochloride\$2 or nemexin\$2 or nodict\$2 or nutrexon\$2 or phaltrexia\$2 or re-via\$2 or regental\$2 or revez\$2 or revia\$2 or trexan\$2 or vivitrex\$2 or vivitrol\$2) adj3 (maintenance\* or substitut\* or replac\* or rehabilit\* or detox\* or therap\* or pharmacotherap\* or pharmaco-therap\* or treatment\* or abuse-deterren\*)).tw. (3497)

180 maintenance therapy/ (33721)

181 (maintenance adj2 (treatment\* or therap\* or pharmacotherap\* or pharmaco-therap\*)).tw. (62997)

182 (OAT or OATs).tw. (19570)

183 (((drug? adj2 dependen\*) or (drug? adj2 addict\*) or (narcotic\* adj2 dependen\*) or (narcotic\* adj2 addict\*) or (opioid\* adj2 dependen\*) or (opioid\* adj2 addict\*) or (opiate\* adj2 dependen\*) or (opiate\* adj2 addict\*) or (substance? adj2 dependen\*) or (substance? adj2 addict\*)) adj3 (treatment\* or therap\* or pharmacotherap\* or pharmaco-therap\*)).tw. (14426)

184 Detoxification/ (24878)

185 detoxif\*.tw. (81609)

186 or/180-185 [OAT] (196651)

187 171 and 186 (32100)

188 159 or 187 (75453)

189 exp Animals/ not (exp Animals/ and Humans/) (15327571)

190 188 not 189 [ANIMAL-ONLY REMOVED] (59727)

191 limit 190 to dissertation [Limit not valid in Embase,Ovid MEDLINE(R),Ovid MEDLINE(R) Daily Update,Ovid MEDLINE(R) In-Process,Ovid MEDLINE(R) Publisher; records were retained] (34146)

192 190 not 191 [DISSERTATIONS REMOVED] (25581)  
 193 limit 192 to "0830 systematic review" [Limit not valid in Embase,Ovid MEDLINE(R),Ovid MEDLINE(R) Daily Update,Ovid MEDLINE(R) In-Process,Ovid MEDLINE(R) Publisher; records were retained] (145)  
 194 limit 192 to 1200 meta analysis [Limit not valid in Embase,Ovid MEDLINE(R),Ovid MEDLINE(R) Daily Update,Ovid MEDLINE(R) In-Process,Ovid MEDLINE(R) Publisher; records were retained] (103)  
 195 limit 192 to 1300 metasynthesis [Limit not valid in Embase,Ovid MEDLINE(R),Ovid MEDLINE(R) Daily Update,Ovid MEDLINE(R) In-Process,Ovid MEDLINE(R) Publisher; records were retained] (0)  
 196 meta analysis/ (228832)  
 197 (meta-analy\* or metanaly\* or metaanaly\* or met analy\* or integrative research or integrative review\* or integrative overview\* or research integration or research overview\* or collaborative review\*).tw. (323004)  
 198 (systematic review\* or systematic overview\* or evidence-based review\* or evidence-based overview\* or (evidence adj3 (review\* or overview\*)) or meta-review\* or meta-overview\* or meta-synthes\* or "review of reviews" or technology assessment\* or HTA or HTAs).tw. (381844)  
 199 (network adj (MA or MAs)).tw. (16)  
 200 (NMA or NMAs).tw. (3955)  
 201 indirect\* compar\*.tw. (4337)  
 202 (indirect treatment\* adj1 compar\*).tw. (544)  
 203 (mixed treatment\* adj1 compar\*).tw. (1172)  
 204 (multiple treatment\* adj1 compar\*).tw. (301)  
 205 (multi-treatment\* adj1 compar\*).tw. (4)  
 206 simultaneous\* compar\*.tw. (2286)  
 207 mixed comparison?.tw. (50)  
 208 or/196-207 (647033)  
 209 192 and 208 (439)  
 210 193 or 194 or 195 or 209 [REVIEWS] (465)  
 211 210 use medall,emczd (0)  
 212 210 not 211 [PSYCINFO RECORDS] (465)  
 213 75 or 152 or 212 [ALL DATABASES] (3166)  
 214 remove duplicates from 213 (2195) [TOTAL UNIQUE RECORDS]  
 215 214 use medall (1367) [MEDLINE UNIQUE RECORDS]  
 216 from 215 keep 1-1000 (1000)  
 217 from 215 keep 1001-1367 (367)  
 218 214 use emczd (574) [EMBASE UNIQUE RECORDS]  
 219 214 not (215 or 218) (254) [PSYCINFO UNIQUE RECORDS]

\*\*\*\*\*

Cochrane Library

Search Name: Opioid Disorders - OAT - Reviews

Date Run: 28/02/18 15:58:45.981

Description: OHRI - Final - 2018 Feb 28

ID Search Hits

#1 [mh "Opiate Substitution Treatment"] 274

#2 ((narcotic\* or opioid\* or opiate\*) near/3 (maintenance\* or substitut\* or replac\*)):ti,ab,kw622

#3 ((narcotic\* or opioid\* or opiate\*) near/3 (decreas\* or detoxif\* or discontinu\* or reduc\* or taper\* or wean\* or withdraw\*)):ti,ab,kw 2167

#4 (((opiate\* or opioid\*) next (agonist\* or receptor\*)) near/3 (maintenance\* or substitut\* or replac\* or rehabilit\* or detox\* or therap\* or pharmacotherap\* or pharmaco-therap\* or treatment\* or abuse-deterren\*)):ti,ab,kw 186

#5 (((opiate\* or opioid\*) next (agonist\* or receptor\*)) near/3 (maintenance\* or substitut\* or replac\* or rehabilit\* or detox\* or therap\* or pharmacotherap\* or pharmaco-therap\* or treatment\* or abuse-deterren\*)):ti,ab,kw 186

#6 {or #1-#5} 2769

#7 [mh ^"Substance-Related Disorders"] 3012

#8 [mh "Substance Abuse, Intravenous"] 439

#9 [mh "Substance Abuse, Oral"] 0

#10 [mh "Opioid-Related Disorders"] 1546

#11 ((narcotic\* or opioid\* or opiate\*) near/3 (abus\* or addict\* or dependen\* or disorder\* or habituat\* or misus\* or mis-us\* or "non-medical" or nonmedical or "non-prescribed" or nonprescribed or "non-prescription" or nonprescription or withdrawal\*) or (("use" or used or uses or using) near/2 (illicit\* or illegal\*)):ti,ab,kw 3215

#12 ((drug or drugs or substance\*) near/3 (abus\* or addict\* or dependen\* or disorder\* or habituat\* or misus\* or mis-us\* or "non-medical use" or "non-medical uses" or "nonmedical use" or "nonmedical uses" or "non-prescribed use" or "non-prescribed uses" or "nonprescribed use" or "nonprescribed uses" or "non-prescription use" or "non-prescription uses" or "nonprescription use" or "nonprescription uses") or (("use" or used or uses or using) near/2 (illicit\* or illegal\*)):ti,ab,kw 14561

#13 (heroin\* near/3 (abus\* or addict\* or dependen\* or disorder\* or habituat\* or misus\* or mis-us\* or "non-medical" or nonmedical or "non-prescribed" or nonprescribed or "non-prescription" or nonprescription or withdrawal\*) or (("use" or used or uses or using) near/2 (illicit\* or illegal\*)):ti,ab,kw 1502

#14 ((hydrocodone or bekadid or codinovo or dico or dicodid or dihydrocodeinone or hycodan or hycon or hydrocodeinonebitartrate or hydrocodon or hydrocon or hydrocodonum or robidone) near/3 (abus\* or addict\* or dependen\* or disorder\* or habituat\* or misus\* or mis-us\* or "non-medical" or nonmedical or "non-prescribed" or nonprescribed or "non-prescription" or nonprescription or withdrawal\*) or (("use" or used or uses or using) near/2 (illicit\* or illegal\*)):ti,ab,kw 606

#15 ((fentanyl or alfentanil or alfenta or alfentanyl or beta hydroxymefentanyl or brifentanil or carfentanil or duragesic or fanaxal or fentanest or fentora or hypnorm or limifen or lofentanil or mefentanyl or mirfentanil or ocfentanil or phentanyl or "R-39209" or "R-4263" or rapifen or remifentanil or sublimaze or sufenta or sufentanil or sulfentanyl or trefentanil) near/3 (abus\* or addict\* or dependen\* or disorder\* or habituat\* or misus\* or mis-us\* or "non-medical" or nonmedical or "non-prescribed" or nonprescribed or "non-prescription" or nonprescription or withdrawal\*) or (("use" or used or uses or using) near/2 (illicit\* or illegal\*)):ti,ab,kw 670

#16 ((morphine or anpec or duramorph or epimorph or miro or morfin or morfine or morphin or morphinium or morphium or MS contin or morphia or opso or oramorph or SDZ 202-250 or SDZ202-250 or skenan or transmorphine or trans-morphine) near/3 (abus\* or addict\* or dependen\* or disorder\* or habituat\* or misus\* or mis-us\* or "non-medical" or nonmedical or "non-prescribed" or nonprescribed or "non-prescription" or nonprescription or withdrawal\*) or (("use" or used or uses or using) near/2 (illicit\* or illegal\*)):ti,ab,kw 898

#17 ((oxycodone or bionine or bionone or bolodorm or broncodal or bucodal or cafacodal or cardanon or codenon or codix 5 or "col 003" or col003 or dihydrohydroxycodone or dihydrohydroxydodeinone or dihydronone or dinarkon or endone or eubine or eucodal or eucodale or eucodalum or eudin or eukdin or eukodal or eumorphal or eurodamine or eutagen or hydrocodal or hydroxycodone or ludonal or m-oxy or medicodal or narcobasina or narcobasine or narcosin or nargenol or narodal or nsc 19043 or nucodan or opton or ossicodone or oxanest or oxaydo or oxecta or oxicone or oxicontin or oxiconum or oxikon or oxy ir or oxycod or oxycodone or oxycodonehydrochloride or oxycodone hydrochloride or oxycodonhydrochlorid or oxycodyl or oxycone or oxycontin or oxydose or oxyfast or oxygesic or oxyir or oxykon or oxynorm or pancodine or pavinal or percolone or pronarcin or remoxy or roxicodone or

roxicodone or sinthiodal or stupenal or supeudol or tebodal or tekodin or thecodin or theocodin or xtampa or xtampza) near/3 (abus\* or addict\* or dependen\* or disorder\* or habituat\* or misus\* or mis-us\* or "non-medical" or nonmedical or "non-prescribed" or nonprescribed or "non-prescription" or nonprescription or withdrawal\*) or (("use" or used or uses or using) near/2 (illicit\* or illegal\*)):ti,ab,kw

669

#18 {or #7-#17} 16618

#19 [mh ^"Substance-Related Disorders"/DT] 191

#20 [mh ^"Substance-Related Disorders"/RH] 673

#21 [mh "Substance Abuse, Intravenous"/DT] 28

#22 [mh "Substance Abuse, Intravenous"/RH] 113

#23 [mh "Substance Abuse, Oral"/DT] 0

#24 [mh "Substance Abuse, Oral"/RH] 0

#25 [mh "Opioid-Related Disorders"/DT] 550

#26 [mh "Opioid-Related Disorders"/RH] 742

#27 [mh "Analgesics, Opioid"/TU] 2713

#28 (OAT or OATs):ti,ab,kw 678

#29 [mh Buprenorphine/TU] 443

#30 [mh Heroin/TU] 75

#31 [mh Hydromorphone/TU] 62

#32 [mh Methadone/TU] 747

#33 [mh Morphine/TU] 1528

#34 [mh Naloxone/TU] 858

#35 ((buprenorphine or anorfin or belbuca or buprenex or buprex or buprine or butrans or finibron or lepetan or "nih 8805" or nih8805 or norphin or pentorel or prefin or probuphine or "rx 6029 m" or "rx 6029m" or rx6029m or subutex or temgesic or transtec or "um 952" or um952) near/3 (maintenance\* or substitut\* or replac\* or rehabilit\* or detox\* or therap\* or pharmacotherap\* or pharmaco-therap\* or treatment\* or abuse-deterren\*)):ti,ab,kw 792

#36 ((buprenorphine-naloxone or naloxone-buprenorphine or suboxone or zubsolv) near/3 (maintenance\* or substitut\* or replac\* or rehabilit\* or detox\* or therap\* or pharmacotherap\* or pharmaco-therap\* or treatment\* or abuse-deterren\*)):ti,ab,kw 106

#37 ((heroin\* or diacetyl morphine or diacetylmorphine or diamorphine or diaphorin or heroine or morphacetin) near/3 (maintenance\* or substitut\* or replac\* or rehabilit\* or detox\* or therap\* or pharmacotherap\* or pharmaco-therap\* or treatment\* or abuse-deterren\*)):ti,ab,kw 594

#38 ((hydromorphon\* or biomorphyl\* or cofalaudid\* or dihydromorphinon\* or dihydromorphon\* or diladid\* or dilaudid\* or dimorphon\* or dolonovag\* or exalgo\* or hydal\* or hydromorph contin\* or hydromorphinone\* or hydrostat\* or hymorphan\* or jurnista\* or laudaconum\* or novolaudon\* or opidol\* or paliadon retardkaps\* or palladon\* or rexaphon\* or semcox\* or sophidone\*) near/3 (maintenance\* or substitut\* or replac\* or rehabilit\* or detox\* or therap\* or pharmacotherap\* or pharmaco-therap\* or treatment\* or abuse-deterren\*)):ti,ab,kw 190

#39 ((methadone or adanon or adanon hydrochloride or algidon or algolysin or algoxale or althose or althose hydrochloride or amidon or amidona or amidone or amidosan or an 148 or an148 or anadon or biodone or butalgin or deamin or depridol or diaminon or dianone or dolafin or dolamid or dolesone or dolmed or dolophine or dolophine hydrochloride or dorex or dorexol or eptadone or fenadon or gobbidona or heptadon or heptanon or hoe 10820 or hoe10820 or ketalgin or l polamidon or mecodin or mepecton or mephenon or metadol or metadon or metasedin or methaddict or methadose or methaforte mix or miadone or moheptan or pallidone or phenadon or physepton or physeptone or polamidon or polamivet or polamivit or sinalgin or symoron or westadone) near/3 (maintenance\* or substitut\* or replac\* or rehabilit\* or detox\* or therap\* or pharmacotherap\* or pharmaco-therap\* or treatment\* or abuse-deterren\*)):ti,ab,kw 1367

#40 ((morphine or anpec or duramorph or epimorph or miro or morfin or morfine or morphin or morphinium or morphium or MS contin or morphia or opso or oramorph or SDZ 202-250 or SDZ202-250



or skenan or transmorphine or trans-morphine) near/3 (maintenance\* or substitut\* or replac\* or rehabilit\* or detox\* or therap\* or pharmacotherap\* or pharmaco-therap\* or treatment\* or abuse-deterren\*)):ti,ab,kw  
2404

#41 ((naloxone or antioplaz or "en 1530" or "en 15304" or en1530 or en15304 or evzio or maloxone or mapin or "MRZ 2593-Br" or "MRZ-2593" or nalone or nalonee or nalone or naloxon curamed or naloxon-ratiopharm or naloxona or narcan or narcanti or narcon or narvcam or naxone or zynox) near/3 (maintenance\* or substitut\* or replac\* or rehabilit\* or detox\* or therap\* or pharmacotherap\* or pharmaco-therap\* or treatment\* or abuse-deterren\*)):ti,ab,kw 542

#42 ((naltrexone or antaxon or antaxone or celupan or "en 1639a" or en1639a or nalerona or nalorex or naltrel or naltrexone hydrochloride or nemexin or nodict or nutrexon or phaltrexia or "re-via" or regental or revez or revia or trexan or vivitrex or vivitrol) near/3 (maintenance\* or substitut\* or replac\* or rehabilit\* or detox\* or therap\* or pharmacotherap\* or pharmaco-therap\* or treatment\* or abuse-deterren\*)):ti,ab,kw 754

#43 (((drug\* near/2 dependen\*) or (drug\* near/2 addict\*) or (substance\* near/2 dependen\*) or (substance\* near/2 addict\*)) near/3 (treatment\* or therap\* or pharmacotherap\* or pharmaco-therap\*)):ti,ab,kw 1529

#44 (maintenance near/2 (treatment\* or therap\* or pharmacotherap\* or pharmaco-therap\*)):ti,ab,kw  
7632

#45 detoxif\*:ti,ab,kw 1453

#46 {or #19-#45} 19190

#47 #18 and #46 4477

#48 #6 or #47 6184

#49 [mh Child] not ([mh Adolescent] or [mh Adult]) 134

#50 [mh Infant] not ([mh Adolescent] or [mh Adult]) 14132

#51 #48 not (#49 or #50) in Cochrane Reviews (Reviews and Protocols), Other Reviews and Technology Assessments

DSR - 124

DARE - 76

HTA - 16

### *Primary Studies*

2018 Mar 8

Database: Embase Classic+Embase <1947 to 2018 March 07>, Ovid MEDLINE(R) ALL <1946 to March 07, 2018>, PsycINFO <1806 to February Week 4 2018>

Search Strategy:

- 
- 1 Opiate Substitution Treatment/ (3624)
  - 2 ((narcotic\* or opioid\* or opiate\*) adj3 (maintenance\* or substitut\* or replac\*)):tw,kf. (6674)
  - 3 ((narcotic\* or opioid\* or opiate\*) adj3 (decreas\* or detoxif\* or discontinu\* or reduc\* or taper\* or wean\* or withdraw\*)):tw,kf. (22092)
  - 4 ((opiate\* agonist\* or opioid\* agonist\* or opiate\* receptor\* or opioid\* receptor\*) adj3 (maintenance\* or substitut\* or replac\* or rehabilit\* or detox\* or therap\* or pharmacotherap\* or pharmaco-therap\* or treatment\* or abuse-deterren\*)):tw,kf. (2044)
  - 5 ((opiate\* agonist\* or opioid\* agonist\* or opiate\* receptor\* or opioid\* receptor\*) adj3 (decreas\* or detoxif\* or discontinu\* or reduc\* or taper\* or wean\* or withdraw\*)):tw,kf. (2055)
  - 6 or/1-5 [OPIATE SUBSTITUTION TREATMENT] (31849)
  - 7 Substance-Related Disorders/ (113410)
  - 8 Substance Abuse, Intravenous/ (63391)

- 9 Substance Abuse, Oral/ [NEW MESH 2018] (0)
- 10 exp Opioid-Related Disorders/ (37049)
- 11 ((narcotic\* or opioid\* or opiate\*) adj3 (abus\* or addict\* or dependen\* or disorder? or habituat\* or misus\* or mis-us\* or non-medical\* or nonmedical\* or non-prescrib\* or nonprescrib\* or non-prescription\* or nonprescription\* or withdrawal\* or (("use" or used or uses or using) adj2 (illicit\* or illegal\*))))).tw,kf. (45711)
- 12 ((drug? or substance?) adj3 (abus\* or addict\* or dependen\* or disorder? or habituat\* or misus\* or mis-us\* or "non-medical use?" or "nonmedical use?" or "non-prescribed use?" or "nonprescribed use?" or "non-prescription use?" or "nonprescription use?" or (("use" or used or uses or using) adj2 (illicit\* or illegal\*))))).tw,kf. (311185)
- 13 (heroin\* adj3 (abus\* or addict\* or dependen\* or disorder? or habituat\* or misus\* or mis-us\* or non-medical\* or nonmedical\* or non-prescrib\* or nonprescrib\* or non-prescription\* or nonprescription\* or withdrawal\* or (("use" or used or uses or using) adj2 (illicit\* or illegal\*))))).tw,kf. (16211)
- 14 ((hydrocodone or bekadid\$2 or codinovo\$2 or dico\$2 or dicodid\$2 or dihydrocodeinone\$2 or hycodan\$2 or hycon\$2 or hydrocodeinonebitartrate\$2 or hydrocodon\$2 or hydrocon\$2 or hydrocodonum\$2 or robidone\$2) adj3 (abus\* or addict\* or dependen\* or disorder? or habituat\* or misus\* or mis-us\* or non-medical\* or nonmedical\* or non-prescrib\* or nonprescrib\* or non-prescription\* or nonprescription\* or withdrawal\* or (("use" or used or uses or using) adj2 (illicit\* or illegal\*))))).tw,kf. (141)
- 15 ((fentanyl or alfentanil\$2 or alfenta\$2 or alfentanyl\$2 or beta hydroxymefentanyl or brifentanil\$2 or carfentanil\$2 or duragesic\$2 or fanaxal\$2 or fentanest\$2 or fentora\$2 or hypnorm\$2 or limifen\$2 or lofentanil\$2 or mefentanyl\$2 or mirfentanil\$2 or ocfentanil\$2 or phentanyl\$2 or R-39209 or R-4263 or rapifen\$2 or remifentanil\$2 or sublimaze\$2 or sufenta\$2 or sufentanil\$2 or sulfentanyl\$2 or trefentanil\$2) adj3 (abus\* or addict\* or dependen\* or disorder? or habituat\* or misus\* or mis-us\* or non-medical\* or nonmedical\* or non-prescrib\* or nonprescrib\* or non-prescription\* or nonprescription\* or withdrawal\* or (("use" or used or uses or using) adj2 (illicit\* or illegal\*))))).tw,kf. (661)
- 16 ((morphine or anpec\$2 or duramorph\$2 or epimorph\$2 or miro\$2 or morfin\$2 or morfine\$2 or morphin\$2 or morphinium\$2 or morphium\$2 or MS contin or morphia\$2 or opso\$2 or oramorph\$2 or SDZ 202-250 or SDZ202-250 or skenan\$2 or transmorphine\$2 or trans-morphine\$2) adj3 (abus\* or addict\* or dependen\* or disorder? or habituat\* or misus\* or mis-us\* or non-medical\* or nonmedical\* or non-prescrib\* or nonprescrib\* or non-prescription\* or nonprescription\* or withdrawal\* or (("use" or used or uses or using) adj2 (illicit\* or illegal\*))))).tw,kf. (12012)
- 17 ((oxycodone or bionine\$2 or bionone\$2 or bolodorm\$2 or broncodal\$2 or bucodal\$2 or cafacodal\$2 or cardanon\$2 or codenon\$2 or codix 5 or "col 003" or col003 or DETERx\$2 or dihydrohydroxycodone or dihydrohydroxydodeinone or dihydrone\$2 or dinarkon\$2 or endone\$2 or eubine\$2 or eucodal\$2 or eucodale\$2 or eucodalum\$2 or eudin\$2 or eukdin\$2 or eukodal\$2 or eumorphal\$2 or eurodamine\$2 or eutagen\$2 or hydrocodal\$2 or hydroxycodone\$2 or ludonal\$2 or m-oxy or medicodal\$2 or narcobasina\$2 or narcobasine\$2 or narcosin\$2 or nargenol\$2 or narodal\$2 or nsc 19043 or nucodan\$2 or opton\$2 or ossicodone\$2 or oxanest\$2 or oxaydo\$2 or oxepta\$2 or oxicone\$2 or oxicontin\$2 or oxiconum\$2 or oxikon\$2 or oxy ir or oxycod\$2 or oxycodone\$2 or oxycodonehydrochloride or oxycodone hydrochloride or oxycodonhydrochlorid or oxycodyl\$2 or oxycone\$2 or oxycontin\$2 or oxydose\$2 or oxyfast\$2 or oxygesic\$2 or oxyir\$2 or oxykon\$2 or oxynorm\$2 or pancodine\$2 or pavinal\$2 or percolone\$2 or pronarcin\$2 or remoxy\$2 or roxicodone\$2 or roxicodone\$2 or sinthiodal\$2 or stupenal\$2 or supeudol\$2 or tebdal\$2 or tekodin\$2 or thecodin\$2 or thecodin\$2 or xtampa\$2 or xtampza\$2) adj3 (abus\* or addict\* or dependen\* or disorder? or habituat\* or misus\* or mis-us\* or non-medical\* or nonmedical\* or non-prescrib\* or nonprescrib\* or non-prescription\* or nonprescription\* or withdrawal\* or (("use" or used or uses or using) adj2 (illicit\* or illegal\*))))).tw,kf. (558)
- 18 or/7-17 [OPIOID USE DISORDERS] (459571)
- 19 Substance-Related Disorders/dt [drug therapy] (3843)
- 20 Substance-Related Disorders/rh [rehabilitation] (10052)

21 Substance Abuse, Intravenous/dt [drug therapy] (327)  
 22 Substance Abuse, Intravenous/rh [rehabilitation] (1404)  
 23 Substance Abuse, Oral/dt [drug therapy] (0)  
 24 Substance Abuse, Oral/rh [rehabilitation] (0)  
 25 exp Opioid-Related Disorders/dt [drug therapy] (8635)  
 26 exp Opioid-Related Disorders/rh [rehabilitation] (6407)  
 27 Analgesics, Opioid/tu [therapeutic use] (13601)  
 28 (OAT or OATs).tw,kf. (19652)  
 29 exp Buprenorphine/tu [therapeutic use] (2073)  
 30 Heroin/tu [therapeutic use] (388)  
 31 Hydromorphone/tu [therapeutic use] (283)  
 32 exp Methadone/tu [therapeutic use] (6503)  
 33 Morphine/tu [therapeutic use] (5144)  
 34 exp Naloxone/tu [therapeutic use] (4403)  
 35 ((buprenorphine or anorfin\$2 or belbuca\$2 or buprenex\$2 or buprex\$2 or buprine\$2 or butrans\$2 or finibron\$2 or lepetan\$2 or nih 8805 or nih8805 or norphin\$2 or pentorel\$2 or prefin\$2 or probuphine\$2 or rx 6029 m or rx 6029m or rx6029m or subutex\$2 or temgesic\$2 or transtec\$2 or um 952 or um952) adj3 (maintenance\* or substitut\* or replac\* or rehabilit\* or detox\* or therap\* or pharmacotherap\* or pharmaco-therap\* or treatment\* or abuse-deterren\*)).tw,kf. (4476)  
 36 ((buprenorphine-naloxone or naloxone-buprenorphine or suboxone\$2 or zubsolv\$2) adj3 (maintenance\* or substitut\* or replac\* or rehabilit\* or detox\* or therap\* or pharmacotherap\* or pharmaco-therap\* or treatment\* or abuse-deterren\*)).tw,kf. (720)  
 37 ((heroin\* or diacetyl morphine or diacetylmorphine or diamorphine or diaphorin\$2 or morphacetin\$2) adj3 (maintenance\* or substitut\* or replac\* or rehabilit\* or detox\* or therap\* or pharmacotherap\* or pharmaco-therap\* or treatment\* or abuse-deterren\*)).tw,kf. (5359)  
 38 ((hydromorphon\* or biomorphyl\$2 or cofalaudid\$2 or dihydromorphinon\* or dihydromorphon\* or diladid\$2 or dilaudid\$2 or dimorphon\* or dolonovag\$2 or exalgo\$2 or hydal\$2 or hydromorph contin\$2 or hydromorphinone\$2 or hydrostat\$2 or hymorphan\$2 or jurnista\$2 or laudaconum\$2 or novolaudon\$2 or opidol\$2 or paliadon retardkaps\$2 or palladon\$2 or rexaphon\$2 or semcox\$2 or sophidone\$2) adj3 (maintenance\* or substitut\* or replac\* or rehabilit\* or detox\* or therap\* or pharmacotherap\* or pharmaco-therap\* or treatment\* or abuse-deterren\*)).tw,kf. (866)  
 39 ((methadone or adanon\$2 or adanon hydrochloride\$2 or algidon\$2 or algolysin\$2 or algoxale\$2 or althose\$2 or althose hydrochloride\$2 or amidon\$2 or amidona\$2 or amidone\$2 or amidosan\$2 or an 148 or an148 or anadon\$2 or biodone\$2 or butalgin\$2 or deamin\$2 or depidol\$2 or diamimon\$2 or dianone\$2 or dolafin\$2 or dolamid\$2 or dolesone\$2 or dolmed\$2 or dolophine\$2 or dolophine hydrochloride\$2 or dorex\$2 or dorexol\$2 or eptadone\$2 or fenadon\$2 or gobbidona\$2 or heptadon\$2 or heptanon\$2 or hoe 10820 or hoe10820 or ketalgin\$2 or l polamidon\$2 or mecodin\$2 or mepecton\$2 or mephenon\$2 or metadol\$2 or metadon\$2 or metasedin\$2 or methaddict\$2 or methadose\$2 or methaforte mix\$2 or miadone\$2 or moheptan\$2 or pallidone\$2 or phenadon\$2 or physepton\$2 or physeptone\$2 or polamidon\$2 or polamivet\$2 or polamivit\$2 or sinalgin\$2 or symoron\$2 or westadone\$2) adj3 (maintenance\* or substitut\* or replac\* or rehabilit\* or detox\* or therap\* or pharmacotherap\* or pharmaco-therap\* or treatment\* or abuse-deterren\*)).tw,kf. (18862)  
 40 ((morphine or anpec\$2 or duramorph\$2 or epimorph\$2 or miro\$2 or morfin\$2 or morfine\$2 or morphin\$2 or morphinium\$2 or morphium\$2 or MS contin or morphia\$2 or opso\$2 or oramorph\$2 or SDZ 202-250 or SDZ202-250 or skenan\$2 or transmorphine\$2 or trans-morphine\$2) adj3 (maintenance\* or substitut\* or replac\* or rehabilit\* or detox\* or therap\* or pharmacotherap\* or pharmaco-therap\* or treatment\* or abuse-deterren\*)).tw,kf. (9245)  
 41 ((naloxone or antioplaz\$2 or en 1530 or en 15304 or en1530 or en15304 or evzio\$2 or maloxone\$2 or mapin\$2 or MRZ 2593-Br or MRZ-2593 or nalone\$2 or nalonee\$2 or nalone\$2 or naloxon curamed\$2 or naloxon-ratiopharm\$2 or naloxona\$2 or narkan\$2 or narcanti\$2 or narcon\$2 or narvcam\$2 or

naxone\$2 or zynox\$2) adj3 (maintenance\* or substitut\* or replac\* or rehabilit\* or detox\* or therap\* or pharmacotherap\* or pharmaco-therap\* or treatment\* or abuse-deterren\*)),tw,kf. (3242)

42 ((naltrexone or antaxon\$2 or antaxone\$2 or celupan\$2 or en 1639a or en1639a or nalerona\$2 or nalorex\$2 or naltrel\$2 or naltrexone hydrochloride\$2 or nemexin\$2 or nodict\$2 or nutrexon\$2 or phaltrexia\$2 or re-via\$2 or regental\$2 or revez\$2 or revia\$2 or trexan\$2 or vivitrex\$2 or vivitrol\$2) adj3 (maintenance\* or substitut\* or replac\* or rehabilit\* or detox\* or therap\* or pharmacotherap\* or pharmaco-therap\* or treatment\* or abuse-deterren\*)),tw,kf. (3500)

43 (((drug? adj2 dependen\*) or (drug? adj2 addict\*) or (narcotic\* adj2 dependen\*) or (narcotic\* adj2 addict\*) or (opioid\* adj2 dependen\*) or (opioid\* adj2 addict\*) or (opiate\* adj2 dependen\*) or (opiate\* adj2 addict\*) or (substance? adj2 dependen\*) or (substance? adj2 addict\*)) adj3 (treatment\* or therap\* or pharmacotherap\* or pharmaco-therap\*)),tw,kf. (14494)

44 (maintenance\* adj2 (treatment\* or therap\* or pharmacotherap\* or pharmaco-therap\*)),tw,kf. (63184)

45 detoxif\*.tw,kf. (81910)

46 or/19-45 [OAT] (237756)

47 18 and 46 (60420)

48 6 or 47 (81284)

49 exp Child/ not (Adolescent/ or exp Adult/) (2426358)

50 exp Infant/ not (Adolescent/ or exp Adult/) (1423228)

51 48 not (49 or 50) [CHILD-/INFANT-ONLY REMOVED] (79640)

52 exp Animals/ not (exp Animals/ and Humans/) (15333675)

53 51 not 52 [ANIMAL-ONLY REMOVED] (61771)

54 (editorial or news or newspaper article).pt. (1211821)

55 53 not 54 [OPINION PIECES REMOVED] (60635)

56 (controlled clinical trial or randomized controlled trial or pragmatic clinical trial).pt. (542931)

57 clinical trials as topic.sh. (182830)

58 exp Randomized Controlled Trials as Topic/ (256860)

59 (randomi#ed or randomly or RCT? or placebo\*).tw,kf. (2130342)

60 ((singl\* or doubl\* or trebl\* or tripl\*) adj (mask\* or blind\* or dumm\*)),tw,kf. (393401)

61 trial.ti. (451602)

62 or/56-61 (2717718)

63 55 and 62 [RCTS] (9307)

64 controlled clinical trial.pt. (92216)

65 Controlled Clinical Trial/ or Controlled Clinical Trials as Topic/ (561253)

66 (control\* adj2 trial\*).tw,kf. (544746)

67 Non-Randomized Controlled Trials as Topic/ (9504)

68 (nonrandom\* or non-random\* or quasi-random\* or quasi-experiment\*).tw,kf. (119371)

69 (nRCT or nRCTs or non-RCT?).tw,kf. (1587)

70 Controlled Before-After Studies/ (209550)

71 (control\* adj3 ("before and after" or "before after")).tw,kf. (9308)

72 Interrupted Time Series Analysis/ (201499)

73 time series.tw,kf. (58363)

74 (pre- adj3 post-).tw,kf. (204737)

75 (pretest adj3 posttest).tw,kf. (16133)

76 Historically Controlled Study/ (219791)

77 (control\* adj2 stud\$3).tw,kf. (497097)

78 Control Groups/ (126334)

79 (control\* adj2 group\$1).tw,kf. (1122551)

80 trial.ti. (451602)

81 or/64-80 (3145677)

82 55 and 81 [NON-RCTS] (7707)

83 63 or 82 [RCTs, NON-RCTs] (11874)

84 83 use medall [MEDLINE RECORDS] (6073)

85 drug dependence treatment/ (7903)

86 opiate substitution treatment/ (3624)

87 ((narcotic\* or opioid\* or opiate\*) adj3 (maintenance\* or substitut\* or replac\*)).tw,kw. (6752)

88 ((narcotic\* or opioid\* or opiate\*) adj3 (decreas\* or detoxif\* or discontinu\* or reduc\* or taper\* or wean\* or withdraw\*)).tw,kw. (22219)

89 ((opiate\* agonist\* or opioid\* agonist\* or opiate\* receptor\* or opioid\* receptor\*) adj3 (maintenance\* or substitut\* or replac\* or rehabilit\* or detox\* or therap\* or pharmacotherap\* or pharmaco-therap\* or treatment\* or abuse-deterren\*)).tw,kw. (2071)

90 ((opiate\* agonist\* or opioid\* agonist\* or opiate\* receptor\* or opioid\* receptor\*) adj3 (decreas\* or detoxif\* or discontinu\* or reduc\* or taper\* or wean\* or withdraw\*)).tw,kw. (2061)

91 methadone treatment/ (4161)

92 or/85-91 [OPIATE SUBSTITUTION TREATMENT] (42590)

93 drug dependence/ (137376)

94 substance abuse/ (181771)

95 exp narcotic dependence/ (138031)

96 ((narcotic\* or opioid\* or opiate\*) adj3 (abus\* or addict\* or dependen\* or disorder? or habituat\* or misus\* or mis-us\* or non-medical\* or nonmedical\* or non-prescrib\* or nonprescrib\* or non-prescription\* or nonprescription\* or withdrawal\* or (("use" or used or uses or using) adj2 (illicit\* or illegal\*))).tw,kw. (46336)

97 ((drug? or substance?) adj3 (abus\* or addict\* or dependen\* or disorder? or habituat\* or misus\* or mis-us\* or "non-medical use?" or "nonmedical use?" or "non-prescribed use?" or "nonprescribed use?" or "non-prescription use?" or "nonprescription use?" or (("use" or used or uses or using) adj2 (illicit\* or illegal\*))).tw,kw. (314491)

98 (heroin\* adj3 (abus\* or addict\* or dependen\* or disorder? or habituat\* or misus\* or mis-us\* or non-medical\* or nonmedical\* or non-prescrib\* or nonprescrib\* or non-prescription\* or nonprescription\* or withdrawal\* or (("use" or used or uses or using) adj2 (illicit\* or illegal\*))).tw,kw. (16394)

99 ((hydrocodone or bekadid\$2 or codinovo\$2 or dico\$2 or dicodid\$2 or dihydrocodeinone\$2 or hycodan\$2 or hycon\$2 or hydrocodeinonebitartrate\$2 or hydrocodon\$2 or hydrocon\$2 or hydrocodonum\$2 or robidone\$2) adj3 (abus\* or addict\* or dependen\* or disorder? or habituat\* or misus\* or mis-us\* or non-medical\* or nonmedical\* or non-prescrib\* or nonprescrib\* or non-prescription\* or nonprescription\* or withdrawal\* or (("use" or used or uses or using) adj2 (illicit\* or illegal\*))).tw,kw. (151)

100 (((fentanyl or alfentanil\$2 or alfenta\$2 or alfentanyl\$2 or beta hydroxymefentanyl or brifentanil\$2 or carfentanil\$2 or duragesic\$2 or fanaxal\$2 or fentanest\$2 or fentora\$2 or hypnorm\$2 or limifen\$2 or lofentanil\$2 or mefentanil\$2 or mirfentanil\$2 or ocfentanil\$2 or phentanyl\$2 or R-39209 or R-4263 or rapifen\$2 or remifentanil\$2 or sublimaze\$2 or sufenta\$2 or sufentanil\$2 or sulfentanil\$2 or trefentanil\$2) adj3 (abus\* or addict\* or dependen\* or disorder? or habituat\* or misus\* or mis-us\* or non-medical\* or nonmedical\* or non-prescrib\* or nonprescrib\* or non-prescription\* or nonprescription\* or withdrawal\* or (("use" or used or uses or using) adj2 (illicit\* or illegal\*))).tw,kw. (670)

101 ((morphine or anpec\$2 or duramorph\$2 or epimorph\$2 or miro\$2 or morfin\$2 or morfine\$2 or morphin\$2 or morphinium\$2 or morphium\$2 or MS contin or morphia\$2 or opso\$2 or oramorph\$2 or SDZ 202-250 or SDZ202-250 or skenan\$2 or transmorphine\$2 or trans-morphine\$2) adj3 (abus\* or addict\* or dependen\* or disorder? or habituat\* or misus\* or mis-us\* or non-medical\* or nonmedical\* or non-prescrib\* or nonprescrib\* or non-prescription\* or nonprescription\* or withdrawal\* or (("use" or used or uses or using) adj2 (illicit\* or illegal\*))).tw,kw. (12021)

102 ((oxycodone or bionine\$2 or bionone\$2 or bolodorm\$2 or broncodal\$2 or bucodal\$2 or cafacodal\$2 or cardanon\$2 or codenon\$2 or codix 5 or "col 003" or col003 or DETERx\$2 or dihydrohydroxycodone or dihydrohydroxydodeinone or dihydrone\$2 or dinarkon\$2 or endone\$2 or eubine\$2 or eucodal\$2 or eucodale\$2 or eucodalum\$2 or eudin\$2 or eukdin\$2 or eukodal\$2 or

eumorphal\$2 or eurodamine\$2 or eutagen\$2 or hydrocodal\$2 or hydroxycodoinoma\$2 or ludonal\$2 or m-oxy or medicodal\$2 or narcobasina\$2 or narcobasine\$2 or narcosin\$2 or nargenol\$2 or narodal\$2 or nsc 19043 or nucodan\$2 or opton\$2 or ossicodone\$2 or oxanest\$2 or oxaydo\$2 or oxecta\$2 or oxicone\$2 or oxicontin\$2 or oxiconum\$2 or oxikon\$2 or oxy ir or oxycod\$2 or oxycodoinon\$2 or oxycodoinonhydrochloride or oxycodone hydrochloride or oxycodonhydrochlorid or oxycodyl\$2 or oxycone\$2 or oxycontin\$2 or oxydose\$2 or oxyfast\$2 or oxygesic\$2 or oxyir\$2 or oxykon\$2 or oxynorm\$2 or pancodine\$2 or pavinal\$2 or percolone\$2 or pronarcin\$2 or remoxy\$2 or roxicodone\$2 or roxycodone\$2 or sinthiodal\$2 or stupenal\$2 or supeudol\$2 or tebodal\$2 or tekodin\$2 or thecodin\$2 or thecodin\$2 or xtampa\$2 or xtampza\$2) adj3 (abus\* or addict\* or dependen\* or disorder? or habituat\* or misus\* or mis-us\* or non-medical\* or nonmedical\* or non-prescrib\* or nonprescrib\* or non-prescription\* or nonprescription\* or withdrawal\* or ("use" or used or uses or using) adj2 (illicit\* or illegal\*))))).tw,kw. (581)

103 or/93-102 [OPIOID USE DISORDERS] (558181)

104 drug dependence/dt [Drug Therapy] (6239)

105 drug dependence/rh [Rehabilitation] (10065)

106 substance abuse/dt [Drug Therapy] (2594)

107 substance abuse/rh [Rehabilitation] (9804)

108 exp narcotic dependence/dt (7354)

109 exp narcotic dependence/rh (1424)

110 (OAT or OATs).tw,kw. (19800)

111 ((buprenorphine or anorfin\$2 or belbuca\$2 or buprenex\$2 or buprex\$2 or buprine\$2 or butrans\$2 or finibron\$2 or lepetan\$2 or nih 8805 or nih8805 or norphin\$2 or pentorel\$2 or prefin\$2 or probuphine\$2 or rx 6029 m or rx 6029m or rx6029m or subutex\$2 or temgesic\$2 or transtec\$2 or um 952 or um952) adj3 (maintenance\* or substitut\* or replac\* or rehabilit\* or detox\* or therap\* or pharmacotherap\* or pharmaco-therap\* or treatment\* or abuse-deterren\*))).tw,kw. (4522)

112 ((buprenorphine-naloxone or naloxone-buprenorphine or suboxone\$2 or zubsolv\$2) adj3 (maintenance\* or substitut\* or replac\* or rehabilit\* or detox\* or therap\* or pharmacotherap\* or pharmaco-therap\* or treatment\* or abuse-deterren\*))).tw,kw. (725)

113 ((hydromorphon\* or biomorphyl\$2 or cofalaudid\$2 or dihydromorphinon\* or dihydromorphon\* or diladid\$2 or dilaudid\$2 or dimorphon\* or dolonovag\$2 or exalgo\$2 or hydal\$2 or hydromorph contin\$2 or hydromorphinone\$2 or hydrostat\$2 or hymorphan\$2 or jurnista\$2 or laudaconum\$2 or novolaudon\$2 or opidol\$2 or paliadon retardkaps\$2 or palladon\$2 or rexaphon\$2 or semcox\$2 or sophidone\$2) adj3 (maintenance\* or substitut\* or replac\* or rehabilit\* or detox\* or therap\* or pharmacotherap\* or pharmaco-therap\* or treatment\* or abuse-deterren\*))).tw,kw. (864)

114 ((heroin\* or diacetyl morphine or diacetylmorphine or diamorphine or diaphorin\$2 or morphacetin\$2) adj3 (maintenance\* or substitut\* or replac\* or rehabilit\* or detox\* or therap\* or pharmacotherap\* or pharmaco-therap\* or treatment\* or abuse-deterren\*))).tw,kw. (5409)

115 ((methadone or adanon\$2 or adanon hydrochloride\$2 or algidon\$2 or algolysin\$2 or algoxale\$2 or althose\$2 or althose hydrochloride\$2 or amidon\$2 or amidona\$2 or amidone\$2 or amidosan\$2 or an 148 or an148 or anadon\$2 or biodone\$2 or butalgin\$2 or deamin\$2 or depridol\$2 or diaminon\$2 or dianone\$2 or dolafin\$2 or dolamid\$2 or dolesone\$2 or dolmed\$2 or dolophine\$2 or dolophine hydrochloride\$2 or dorex\$2 or dorexol\$2 or eptadone\$2 or fenadon\$2 or gobbidona\$2 or heptadon\$2 or heptanon\$2 or hoe 10820 or hoe10820 or ketalgin\$2 or l polamidon\$2 or mecodin\$2 or mepecton\$2 or mephenon\$2 or metadol\$2 or metadon\$2 or metasedin\$2 or methaddict\$2 or methadose\$2 or methaforte mix\$2 or miadone\$2 or moheptan\$2 or pallidone\$2 or phenadon\$2 or physepton\$2 or physeptone\$2 or polamidon\$2 or polamivet\$2 or polamivit\$2 or sinalgin\$2 or symoron\$2 or westadone\$2) adj3 (maintenance\* or substitut\* or replac\* or rehabilit\* or detox\* or therap\* or pharmacotherap\* or pharmaco-therap\* or treatment\* or abuse-deterren\*))).tw,kw. (18991)

116 ((morphine or anpec\$2 or duramorph\$2 or epimorph\$2 or miro\$2 or morfin\$2 or morfine\$2 or morphin\$2 or morphinium\$2 or morphium\$2 or MS contin or morphia\$2 or opso\$2 or oramorph\$2 or SDZ 202-250 or SDZ202-250 or skenan\$2 or transmorphine\$2 or trans-morphine\$2) adj3 (maintenance\*

or substitut\* or replac\* or rehabilit\* or detox\* or therap\* or pharmacotherap\* or pharmaco-therap\* or treatment\* or abuse-deterren\*)).tw,kw. (9236)

117 ((naloxone or antiopiaz\$2 or en 1530 or en 15304 or en1530 or en15304 or evzio\$2 or maloxone\$2 or mapin\$2 or MRZ 2593-Br or MRZ-2593 or nalone\$2 or nalonee\$2 or nalone\$2 or naloxon curamed\$2 or naloxon-ratiopharm\$2 or naloxona\$2 or narkan\$2 or narkanti\$2 or narcon\$2 or narvcam\$2 or naxone\$2 or zynox\$2) adj3 (maintenance\* or substitut\* or replac\* or rehabilit\* or detox\* or therap\* or pharmacotherap\* or pharmaco-therap\* or treatment\* or abuse-deterren\*)).tw,kw. (3251)

118 ((naltrexone or antaxon\$2 or antaxone\$2 or celupan\$2 or en 1639a or en1639a or nalerona\$2 or nalorex\$2 or naltrel\$2 or naltrexone hydrochloride\$2 or nemexin\$2 or nodict\$2 or nutrexon\$2 or phaltrexia\$2 or re-via\$2 or regental\$2 or revez\$2 or revia\$2 or trexan\$2 or vivitrex\$2 or vivitrol\$2) adj3 (maintenance\* or substitut\* or replac\* or rehabilit\* or detox\* or therap\* or pharmacotherap\* or pharmaco-therap\* or treatment\* or abuse-deterren\*)).tw,kw. (3526)

119 maintenance therapy/ (33792)

120 (maintenance\* adj2 (treatment\* or therap\* or pharmacotherap\* or pharmaco-therap\*)).tw,kw. (63504)

121 (((drug? adj2 dependen\*) or (drug? adj2 addict\*) or (narcotic\* adj2 dependen\*) or (narcotic\* adj2 addict\*) or (opioid\* adj2 dependen\*) or (opioid\* adj2 addict\*) or (opiate\* adj2 dependen\*) or (opiate\* adj2 addict\*) or (substance? adj2 dependen\*) or (substance? adj2 addict\*)) adj3 (treatment\* or therap\* or pharmacotherap\* or pharmaco-therap\*)).tw,kw. (14496)

122 detoxif\*.tw,kw. (82783)

123 or/104-122 [OAT] (234260)

124 103 and 123 (61433)

125 92 or 124 [OPIATE SUBSTITUTION TREATMENT/OAT] (89504)

126 exp child/ not (exp adult/ or adolescent/) (2426358)

127 exp infant/ not (exp adult/ or adolescent/) (1423228)

128 fetus/ not (exp adult/ or adolescent/) (233921)

129 or/126-128 (3037869)

130 125 not 129 [CHILD-/INFANT-/FETUS-ONLY REMOVED] (87684)

131 exp animal experimentation/ or exp animal model/ or exp animal experiment/ or nonhuman/ or exp vertebrate/ (46665954)

132 exp human/ or exp human experimentation/ or exp human experiment/ (36405350)

133 131 not 132 (10262306)

134 130 not 133 [ANIMAL-ONLY REMOVED] (76221)

135 editorial.pt. (1008952)

136 134 not 135 [OPINION PIECES REMOVED] (75191)

137 randomized controlled trial/ or controlled clinical trial/ (1211158)

138 exp "clinical trial (topic)"/ (259488)

139 (randomi#ed or randomly or RCT? or placebo\*).tw,kw. (2132297)

140 ((singl\* or doubl\* or trebl\* or tripl\*) adj (mask\* or blind\* or dumm\*)).tw,kw. (393554)

141 trial.ti. (451602)

142 or/137-141 (2879876)

143 136 and 142 [RCTs] (12312)

144 controlled clinical trial/ (548392)

145 "controlled clinical trial (topic)"/ (9211)

146 (control\* adj2 trial\*).tw,kw. (548688)

147 (nonrandom\* or non-random\* or quasi-random\* or quasi-experiment\*).tw,kw. (119556)

148 (nRCT or nRCTs or non-RCT?).tw,kw. (1587)

149 (control\* adj3 ("before and after" or "before after")).tw,kw. (9314)

150 time series analysis/ (20412)

151 time series.tw,kw. (59079)

152 pretest posttest control group design/ (330)

153 (pre- adj3 post-).tw,kw. (204764)  
154 (pretest adj3 posttest).tw,kw. (16137)  
155 controlled study/ (5805677)  
156 (control\* adj2 stud\$3).tw,kw. (498541)  
157 control group/ (126334)  
158 (control\* adj2 group\$1).tw,kw. (1122314)  
159 trial.ti. (451602)  
160 or/144-159 (7788912)  
161 136 and 160 [NON-RCTs] (14582)  
162 143 or 161 [RCTs, NON-RCTs] (18828)  
163 conference abstract.pt. (2909461)  
164 limit 163 to yr="2016-current" (653386)  
165 162 and 164 (677)  
166 162 not 163 [ALL CONFERENCE ABSTRACTS REMOVED] (17213)  
167 165 or 166 [CONFERENCE ABSTRACTS PRIOR TO 2016 REMOVED] (17890)  
168 167 use emczd [EMBASE RECORDS] (10578)  
169 Drug Rehabilitation/ (19849)  
170 ((narcotic\* or opioid\* or opiate\*) adj3 (maintenance\* or substitut\* or replac\*)).tw. (6592)  
171 ((narcotic\* or opioid\* or opiate\*) adj3 (decreas\* or detoxif\* or discontinu\* or reduc\* or taper\* or wean\* or withdraw\*)).tw. (22069)  
172 ((opiate\* agonist\* or opioid\* agonist\* or opiate\* receptor\* or opioid\* receptor\*) adj3 (maintenance\* or substitut\* or replac\* or rehabilit\* or detox\* or therap\* or pharmacotherap\* or pharmaco-therap\* or treatment\* or abuse-deterren\*)).tw. (2031)  
173 ((opiate\* agonist\* or opioid\* agonist\* or opiate\* receptor\* or opioid\* receptor\*) adj3 (decreas\* or detoxif\* or discontinu\* or reduc\* or taper\* or wean\* or withdraw\*)).tw. (2055)  
174 methadone maintenance/ (7584)  
175 or/169-174 [OPIATE SUBSTITUTION TREATMENT] (54345)  
176 exp drug dependency/ (246610)  
177 drug abuse/ (182359)  
178 "substance use disorder"/ (129822)  
179 Intravenous Drug Usage/ (3663)  
180 ((narcotic\* or opioid\* or opiate\*) adj3 (abus\* or addict\* or dependen\* or disorder? or habituat\* or misus\* or mis-us\* or non-medical\* or nonmedical\* or non-prescrib\* or nonprescrib\* or non-prescription\* or nonprescription\* or withdrawal\* or ("use" or used or uses or using) adj2 (illicit\* or illegal\*))))).tw. (45506)  
181 ((drug? or substance?) adj3 (abus\* or addict\* or dependen\* or disorder? or habituat\* or misus\* or mis-us\* or "non-medical use?" or "nonmedical use?" or "non-prescribed use?" or "nonprescribed use?" or "non-prescription use?" or "nonprescription use?" or ("use" or used or uses or using) adj2 (illicit\* or illegal\*))))).tw. (308682)  
182 (heroin\* adj3 (abus\* or addict\* or dependen\* or disorder? or habituat\* or misus\* or mis-us\* or non-medical\* or nonmedical\* or non-prescrib\* or nonprescrib\* or non-prescription\* or nonprescription\* or withdrawal\* or ("use" or used or uses or using) adj2 (illicit\* or illegal\*))))).tw. (16185)  
183 ((hydrocodone or bekadid\$2 or codinovo\$2 or dico\$2 or dicodid\$2 or dihydrocodeinone\$2 or hycodan\$2 or hycon\$2 or hydrocodeinonebitartrate\$2 or hydrocodon\$2 or hydrocon\$2 or hydrocodonum\$2 or robidone\$2) adj3 (abus\* or addict\* or dependen\* or disorder? or habituat\* or misus\* or mis-us\* or non-medical\* or nonmedical\* or non-prescrib\* or nonprescrib\* or non-prescription\* or nonprescription\* or withdrawal\* or ("use" or used or uses or using) adj2 (illicit\* or illegal\*))))).tw. (141)  
184 ((fentanyl or alfentanil\$2 or alfenta\$2 or alfentanil\$2 or beta hydroxymefentanyl or brifentanil\$2 or carfentanil\$2 or duragesic\$2 or fanaxal\$2 or fentanest\$2 or fentora\$2 or hypnorm\$2 or limifen\$2 or lofentanil\$2 or mefentanil\$2 or mirfentanil\$2 or ocfentanil\$2 or phentanyl\$2 or R-39209 or R-4263 or rapifen\$2 or remifentanil\$2 or sublimaze\$2 or sufenta\$2 or sufentanil\$2 or sulfentanil\$2 or trefentanil\$2)



adj3 (abus\* or addict\* or dependen\* or disorder? or habituat\* or misus\* or mis-us\* or non-medical\* or nonmedical\* or non-prescrib\* or nonprescrib\* or non-prescription\* or nonprescription\* or withdrawal\* or ("use" or used or uses or using) adj2 (illicit\* or illegal\*))).tw. (660)

185 ((morphine or anpec\$2 or duramorph\$2 or epimorph\$2 or miro\$2 or morfin\$2 or morfine\$2 or morphin\$2 or morphinium\$2 or morphium\$2 or MS contin or morphia\$2 or opso\$2 or oramorph\$2 or SDZ 202-250 or SDZ202-250 or skenan\$2 or transmorphine\$2 or trans-morphine\$2) adj3 (abus\* or addict\* or dependen\* or disorder? or habituat\* or misus\* or mis-us\* or non-medical\* or nonmedical\* or non-prescrib\* or nonprescrib\* or non-prescription\* or nonprescription\* or withdrawal\* or ("use" or used or uses or using) adj2 (illicit\* or illegal\*))).tw. (11917)

186 ((oxycodone or bionine\$2 or bionone\$2 or bolodorm\$2 or broncodal\$2 or bucodal\$2 or cafacodal\$2 or cardanon\$2 or codenon\$2 or codix 5 or "col 003" or col003 or DETERx\$2 or dihydrohydroxycodeinone or dihydrohydroxydodeinone or dihydrone\$2 or dinarkon\$2 or endone\$2 or eubine\$2 or eucodal\$2 or eucodale\$2 or eucodalum\$2 or eudin\$2 or eukdin\$2 or eukodal\$2 or eumorphal\$2 or eurodamine\$2 or eutagen\$2 or hydrocodal\$2 or hydroxycodeinoma\$2 or ludonal\$2 or m-oxy or medicodal\$2 or narcobasina\$2 or narcobasine\$2 or narcosin\$2 or nargenol\$2 or narodal\$2 or nsc 19043 or nucodan\$2 or opton\$2 or ossicodone\$2 or oxanest\$2 or oxaydo\$2 or oxecta\$2 or oxicone\$2 or oxicontin\$2 or oxiconum\$2 or oxikon\$2 or oxy ir or oxycod\$2 or oxycodeinon\$2 or oxycodeinonhydrochloride or oxycodone hydrochloride or oxycodonhydrochlorid or oxycodyl\$2 or oxycone\$2 or oxycontin\$2 or oxydose\$2 or oxyfast\$2 or oxygesic\$2 or oxyir\$2 or oxykon\$2 or oxynorm\$2 or pancodine\$2 or pavinal\$2 or percolone\$2 or pronarcin\$2 or remoxy\$2 or roxicodone\$2 or roxycodone\$2 or sinthiodal\$2 or stupenal\$2 or supeudol\$2 or tebodal\$2 or tekodin\$2 or thecodin\$2 or theocodin\$2 or xtampa\$2 or xtampza\$2) adj3 (abus\* or addict\* or dependen\* or disorder? or habituat\* or misus\* or mis-us\* or non-medical\* or nonmedical\* or non-prescrib\* or nonprescrib\* or non-prescription\* or nonprescription\* or withdrawal\* or ("use" or used or uses or using) adj2 (illicit\* or illegal\*))).tw. (557)

187 or/176-186 [OPIOID USE DISORDERS] (610357)

188 ((buprenorphine or anorfin\$2 or belbuc\$2 or buprenex\$2 or buprex\$2 or buprine\$2 or butrans\$2 or finibron\$2 or lepetan\$2 or nih 8805 or nih8805 or norphin\$2 or pentorel\$2 or prefin\$2 or probuphine\$2 or rx 6029 m or rx 6029m or rx6029m or subutex\$2 or temgesic\$2 or transtec\$2 or um 952 or um952) adj3 (maintenance\* or substitut\* or replac\* or rehabilit\* or detox\* or therap\* or pharmacotherap\* or pharmaco-therap\* or treatment\* or abuse-deterren\*))).tw. (4475)

189 ((buprenorphine-naloxone or naloxone-buprenorphine or suboxone\$2 or zubsolv\$2) adj3 (maintenance\* or substitut\* or replac\* or rehabilit\* or detox\* or therap\* or pharmacotherap\* or pharmaco-therap\* or treatment\* or abuse-deterren\*))).tw. (720)

190 ((hydromorphon\* or biomorphyl\$2 or cofalaudid\$2 or dihydromorphinon\* or dihydromorphon\* or diladid\$2 or dilaudid\$2 or dimorphon\* or dolonovag\$2 or exalgo\$2 or hydal\$2 or hydromorph contin\$2 or hydromorphinone\$2 or hydrostat\$2 or hymorphan\$2 or jornista\$2 or laudaconum\$2 or novolaudon\$2 or opidol\$2 or paliadon retardkaps\$2 or palladon\$2 or rexaphon\$2 or semcox\$2 or sophidone\$2) adj3 (maintenance\* or substitut\* or replac\* or rehabilit\* or detox\* or therap\* or pharmacotherap\* or pharmaco-therap\* or treatment\* or abuse-deterren\*))).tw. (859)

191 ((heroin\* or diacetyl morphine or diacetylmorphine or diamorphine or diaphorin\$2 or heroine\$2 or morphacetin\$2) adj3 (maintenance\* or substitut\* or replac\* or rehabilit\* or detox\* or therap\* or pharmacotherap\* or pharmaco-therap\* or treatment\* or abuse-deterren\*))).tw. (5352)

192 ((methadone or adanon\$2 or adanon hydrochloride\$2 or algidon\$2 or algolysin\$2 or algoxale\$2 or althose\$2 or althose hydrochloride\$2 or amidon\$2 or amidona\$2 or amidone\$2 or amidosan\$2 or an 148 or an148 or anadon\$2 or biodone\$2 or butalgin\$2 or deamin\$2 or depridol\$2 or diaminion\$2 or dianone\$2 or dolafin\$2 or dolamid\$2 or dolesone\$2 or dolmed\$2 or dolophine\$2 or dolophine hydrochloride\$2 or dorex\$2 or dorexol\$2 or eptadone\$2 or fenadon\$2 or gobbidona\$2 or heptadon\$2 or heptanon\$2 or hoe 10820 or hoe10820 or ketalgin\$2 or l polamidon\$2 or mecodin\$2 or mepecton\$2 or mephenon\$2 or metadol\$2 or metadon\$2 or metasedin\$2 or methaddict\$2 or methadose\$2 or methaforte mix\$2 or miadone\$2 or moheptan\$2 or pallidone\$2 or phenadon\$2 or physepton\$2 or physeptone\$2 or

polamidon\$2 or polamivet\$2 or polamivit\$2 or sinalgin\$2 or symoron\$2 or westadone\$2) adj3  
 (maintenance\* or substitut\* or replac\* or rehabilit\* or detox\* or therap\* or pharmacotherap\* or  
 pharmaco-therap\* or treatment\* or abuse-deterren\*)).tw. (18833)

193 ((morphine or anpec\$2 or duramorph\$2 or epimorph\$2 or miro\$2 or morfin\$2 or morfine\$2 or  
 morphin\$2 or morphinium\$2 or morphium\$2 or MS contin or morphia\$2 or opso\$2 or oramorph\$2 or  
 SDZ 202-250 or SDZ202-250 or skenan\$2 or transmorphine\$2 or trans-morphine\$2) adj3 (maintenance\*  
 or substitut\* or replac\* or rehabilit\* or detox\* or therap\* or pharmacotherap\* or pharmaco-therap\* or  
 treatment\* or abuse-deterren\*)).tw. (9202)

194 ((naloxone or antioplaz\$2 or en 1530 or en 15304 or en1530 or en15304 or evzio\$2 or maloxone\$2  
 or mapin\$2 or MRZ 2593-Br or MRZ-2593 or nalone\$2 or nalonee\$2 or nalone\$2 or naloxon curamed\$2  
 or naloxon-ratiopharm\$2 or naloxona\$2 or narkan\$2 or narcanti\$2 or narcon\$2 or narvcam\$2 or  
 naxone\$2 or zynox\$2) adj3 (maintenance\* or substitut\* or replac\* or rehabilit\* or detox\* or therap\* or  
 pharmacotherap\* or pharmaco-therap\* or treatment\* or abuse-deterren\*)).tw. (3242)

195 ((naltrexone or antaxon\$2 or antaxone\$2 or celupan\$2 or en 1639a or en1639a or nalerona\$2 or  
 nalorex\$2 or naltrel\$2 or naltrexone hydrochloride\$2 or nemexin\$2 or nodict\$2 or nutrexon\$2 or  
 phaltrexia\$2 or re-via\$2 or regental\$2 or revez\$2 or revia\$2 or trexan\$2 or vivitrex\$2 or vivitrol\$2) adj3  
 (maintenance\* or substitut\* or replac\* or rehabilit\* or detox\* or therap\* or pharmacotherap\* or  
 pharmaco-therap\* or treatment\* or abuse-deterren\*)).tw. (3500)

196 maintenance therapy/ (33792)

197 (maintenance adj2 (treatment\* or therap\* or pharmacotherap\* or pharmaco-therap\*)).tw. (63066)

198 (OAT or OATs).tw. (19595)

199 (((drug? adj2 dependen\*) or (drug? adj2 addict\*) or (narcotic\* adj2 dependen\*) or (narcotic\* adj2  
 addict\*) or (opioid\* adj2 dependen\*) or (opioid\* adj2 addict\*) or (opiate\* adj2 dependen\*) or (opiate\*  
 adj2 addict\*) or (substance? adj2 dependen\*) or (substance? adj2 addict\*)) adj3 (treatment\* or therap\* or  
 pharmacotherap\* or pharmaco-therap\*)).tw. (14432)

200 Detoxification/ (24900)

201 detoxif\*.tw. (81660)

202 or/196-201 [OAT] (196836)

203 187 and 202 (32124)

204 175 or 203 (75534)

205 exp Animals/ not (exp Animals/ and Humans/) (15333675)

206 204 not 205 [ANIMAL-ONLY REMOVED] (59807)

207 limit 206 to dissertation [Limit not valid in Embase,Ovid MEDLINE(R),Ovid MEDLINE(R) Daily  
 Update,Ovid MEDLINE(R) In-Process,Ovid MEDLINE(R) Publisher; records were retained] (34223)

208 206 not 207 [DISSERTATIONS REMOVED] (25584)

209 clinical trials/ (88570)

210 (randomi#ed or randomly or RCT\$1 or placebo\*).tw. (2128678)

211 ((singl\* or doubl\* or trebl\* or tripl\*) adj (mask\* or blind\* or dumm\*)).tw. (393325)

212 trial.ti. (451602)

213 or/209-212 (2382942)

214 208 and 213 [RCTS] (2802)

215 (control\* adj2 trial\*).tw. (542859)

216 (nonrandom\* or non-random\* or quasi-random\* or quasi-experiment\*).tw. (119259)

217 (nRCT or nRCTs or non-RCT?).tw. (1587)

218 (control\* adj3 ("before and after" or "before after")).tw. (9304)

219 time series/ (20212)

220 time series.tw. (58035)

221 (pretest adj3 posttest).tw. (16129)

222 (control\* adj2 stud\$3).tw. (496251)

223 Experiment Controls/ (893)

224 (control\* adj2 group\$1).tw. (1122209)

225 trial.ti. (451602)  
 226 or/215-225 (2391206)  
 227 208 and 226 [NON-RCTS] (1947)  
 228 214 or 227 [RCTs, NON-RCTs] (3438)  
 229 228 use medall,emcxd (0)  
 230 228 not 229 [PSYCINFO RECORDS] (3438)  
 231 84 or 168 or 230 [ALL DATABASES] (20089)  
 232 limit 231 to yr=2015-current (4432)  
 233 remove duplicates from 232 (3210)  
 234 limit 231 to yr=2009-2014 (5616)  
 235 remove duplicates from 234 (3777)  
 236 limit 231 to yr=2001-2008 (5779)  
 237 remove duplicates from 236 (4080)  
 238 231 not (232 or 234 or 236) (4262)  
 239 remove duplicates from 238 (2991)  
 240 233 or 235 or 237 or 239 (14058) [TOTAL UNIQUE RECORDS]  
 241 240 use medall (5974) [MEDLINE UNIQUE RECORDS]  
 242 240 use emcxd (6532) [EMBASE UNIQUE RECORDS]  
 243 240 not (241 or 242) (1552) [PSYCINFO UNIQUE RECORDS]

\*\*\*\*\*

## Cochrane Library

Search Name: Opioid Disorders - OAT - Trials

Date Run: 08/03/18 17:35:11.300

Description: OHRI - Final - Conference Abstracts Removed

## ID Search Hits

#1 [mh "Opiate Substitution Treatment"] 274  
 #2 ((narcotic\* or opioid\* or opiate\*) near/3 (maintenance\* or substitut\* or replac\*)):ti,ab,kw 622  
 #3 (((opiate\* or opioid\*) next (agonist\* or receptor\*)) near/3 (maintenance\* or substitut\* or replac\* or rehabilit\* or detox\* or therap\* or pharmacotherap\* or pharmaco-therap\* or treatment\* or abuse-deterren\*)):ti,ab,kw 186  
 #4 {or #1-#3} 764  
 #5 [mh ^"Substance-Related Disorders"] 3012  
 #6 [mh "Substance Abuse, Intravenous"] 439  
 #7 [mh "Substance Abuse, Oral"] 0  
 #8 [mh "Opioid-Related Disorders"] 1546  
 #9 ((narcotic\* or opioid\* or opiate\*) near/3 (abus\* or addict\* or dependen\* or disorder\* or habituat\* or misus\* or mis-us\* or "non-medical" or nonmedical or "non-prescribed" or nonprescribed or "non-prescription" or nonprescription or withdrawal\*) or (("use" or used or uses or using) near/2 (illicit\* or illegal\*)):ti,ab,kw 3215  
 #10 ((drug or drugs or substance\*) near/3 (abus\* or addict\* or dependen\* or disorder\* or habituat\* or misus\* or mis-us\* or "non-medical use" or "non-medical uses" or "nonmedical use" or "nonmedical uses" or "non-prescribed use" or "non-prescribed uses" or "nonprescribed use" or "nonprescribed uses" or "non-prescription use" or "non-prescription uses" or "nonprescription use" or "nonprescription uses") or (("use" or used or uses or using) near/2 (illicit\* or illegal\*)):ti,ab,kw 14561  
 #11 (heroin\* near/3 (abus\* or addict\* or dependen\* or disorder\* or habituat\* or misus\* or mis-us\* or "non-medical" or nonmedical or "non-prescribed" or nonprescribed or "non-prescription" or nonprescription or withdrawal\*) or (("use" or used or uses or using) near/2 (illicit\* or illegal\*)):ti,ab,kw 1502

#12 ((hydrocodone or bekadid or codinovo or dico or dicodid or dihydrocodeinone or hycodan or hycon or hydrocodeinonebitartrate or hydrocodon or hydrocon or hydrocodonum or robidone) near/3 (abus\* or addict\* or dependen\* or disorder\* or habituat\* or misus\* or mis-us\* or "non-medical" or nonmedical or "non-prescribed" or nonprescribed or "non-prescription" or nonprescription or withdrawal\*) or (("use" or used or uses or using) near/2 (illicit\* or illegal\*))) :ti,ab,kw 606

#13 ((fentanyl or alfentanil or alfenta or alfentanyl or beta hydroxymefentanyl or brifentanil or carfentanil or duragesic or fanaxal or fentanest or fentora or hypnorm or limifen or lofentanil or mefentanyl or mirfentanil or ofentanil or phentanyl or "R-39209" or "R-4263" or rapifen or remifentanil or sublimaze or sufenta or sufentanil or sulfentanyl or trefentanil) near/3 (abus\* or addict\* or dependen\* or disorder\* or habituat\* or misus\* or mis-us\* or "non-medical" or nonmedical or "non-prescribed" or nonprescribed or "non-prescription" or nonprescription or withdrawal\*) or (("use" or used or uses or using) near/2 (illicit\* or illegal\*))) :ti,ab,kw 670

#14 ((morphine or anpec or duramorph or epimorph or miro or morfin or morfine or morphin or morphinium or morphium or MS contin or morphia or opso or oramorph or SDZ 202-250 or SDZ202-250 or skenan or transmorphine or trans-morphine) near/3 (abus\* or addict\* or dependen\* or disorder\* or habituat\* or misus\* or mis-us\* or "non-medical" or nonmedical or "non-prescribed" or nonprescribed or "non-prescription" or nonprescription or withdrawal\*) or (("use" or used or uses or using) near/2 (illicit\* or illegal\*))) :ti,ab,kw 898

#15 ((oxycodone or bionine or bionone or bolodorm or broncodal or bucodal or cafacodal or cardanon or codenon or codix 5 or "col 003" or col003 or dihydrohydroxycodone or dihydrohydroxydodeinone or dihydron or dinarkon or endone or eubine or eucodal or eucodale or eucodalum or eudin or eukdin or eukodal or eumorphal or eurodamine or eutagen or hydrocodal or hydroxycodone or ludonal or m-oxy or medicodal or narcobasina or narcobasine or narcosin or nargenol or narodal or nsc 19043 or nucodan or opton or ossicodone or oxanest or oxaydo or oxecta or oxicone or oxicontin or oxiconum or oxikon or oxy ir or oxycod or oxycodone or oxycodonehydrochloride or oxycodone hydrochloride or oxycodonhydrochlorid or oxycodyl or oxycone or oxycontin or oxydose or oxyfast or oxygesic or oxyir or oxykon or oxynorm or pancodine or pavinal or percolone or pronarcin or remoxy or roxicodone or roxicodone or sinthiodal or stupenal or supeudol or tebodal or tekodin or thecodin or thecodin or xtampa or xtampza) near/3 (abus\* or addict\* or dependen\* or disorder\* or habituat\* or misus\* or mis-us\* or "non-medical" or nonmedical or "non-prescribed" or nonprescribed or "non-prescription" or nonprescription or withdrawal\*) or (("use" or used or uses or using) near/2 (illicit\* or illegal\*))) :ti,ab,kw 669

#16 {or #5-#15} 16618

#17 [mh ^"Substance-Related Disorders"/DT] 191

#18 [mh ^"Substance-Related Disorders"/RH] 673

#19 [mh "Substance Abuse, Intravenous"/DT] 28

#20 [mh "Substance Abuse, Intravenous"/RH] 113

#21 [mh "Substance Abuse, Oral"/DT] 0

#22 [mh "Substance Abuse, Oral"/RH] 0

#23 [mh "Opioid-Related Disorders"/DT] 550

#24 [mh "Opioid-Related Disorders"/RH] 742

#25 [mh "Analgesics, Opioid"/TU] 2713

#26 (OAT or OATs):ti,ab,kw 678

#27 [mh Buprenorphine/TU] 443

#28 [mh Heroin/TU] 75

#29 [mh Hydromorphone/TU] 62

#30 [mh Methadone/TU] 747

#31 [mh Morphine/TU] 1528

#32 [mh Naloxone/TU] 858

#33 ((buprenorphine or anorfin or belbuca or buprenex or buprex or buprine or butrans or finibron or lepetan or "nih 8805" or nih8805 or norphin or pentorel or prefin or probuphine or "rx 6029 m" or "rx

6029m" or rx6029m or subutex or temgesic or transtec or "um 952" or um952) near/3 (maintenance\* or substitut\* or replac\* or rehabilit\* or detox\* or therap\* or pharmacotherap\* or pharmaco-therap\* or treatment\* or abuse-deterren\*)):ti,ab,kw 792

#34 ((buprenorphine-naloxone or naloxone-buprenorphine or suboxone or zubsolv) near/3 (maintenance\* or substitut\* or replac\* or rehabilit\* or detox\* or therap\* or pharmacotherap\* or pharmaco-therap\* or treatment\* or abuse-deterren\*)):ti,ab,kw 106

#35 ((heroin\* or diacetyl morphine or diacetylmorphine or diamorphine or diaphorin or heroine or morphacetin) near/3 (maintenance\* or substitut\* or replac\* or rehabilit\* or detox\* or therap\* or pharmacotherap\* or pharmaco-therap\* or treatment\* or abuse-deterren\*)):ti,ab,kw 594

#36 ((hydromorphon\* or biomorphyl\* or cofalaudid\* or dihydromorphinon\* or dihydromorphon\* or diladid\* or dilaudid\* or dimorphon\* or dolonovag\* or exalgo\* or hydal\* or hydromorph contin\* or hydromorphinone\* or hydrostat\* or hymorphan\* or jurnista\* or laudaconum\* or novolaudon\* or opidol\* or paliadon retardkaps\* or palladon\* or rexaphon\* or semcox\* or sophidone\*) near/3 (maintenance\* or substitut\* or replac\* or rehabilit\* or detox\* or therap\* or pharmacotherap\* or pharmaco-therap\* or treatment\* or abuse-deterren\*)):ti,ab,kw 190

#37 ((methadone or adanon or adanon hydrochloride or algidon or algolysin or algoxale or althose or althose hydrochloride or amidon or amidona or amidone or amidosan or an 148 or an148 or anadon or biodone or butalgin or deamin or depridol or diaminon or dianone or dolafin or dolamid or dolesone or dolmed or dolophine or dolophine hydrochloride or dorex or dorexol or eptadone or fenadon or gobbidona or heptadon or heptanon or hoe 10820 or hoe10820 or ketalgin or l polamidon or mecodin or mepecton or mephenon or metadol or metadon or metasedin or methaddict or methadose or methaforte mix or miadone or moheptan or pallidone or phenadon or physepton or physeptone or polamidon or polamivet or polamivit or sinalgin or symoron or westadone) near/3 (maintenance\* or substitut\* or replac\* or rehabilit\* or detox\* or therap\* or pharmacotherap\* or pharmaco-therap\* or treatment\* or abuse-deterren\*)):ti,ab,kw 1367

#38 ((morphine or anpec or duramorph or epimorph or miro or morfin or morfine or morphin or morphinium or morphium or MS contin or morphia or opso or oramorph or SDZ 202-250 or SDZ202-250 or skenan or transmorphine or trans-morphine) near/3 (maintenance\* or substitut\* or replac\* or rehabilit\* or detox\* or therap\* or pharmacotherap\* or pharmaco-therap\* or treatment\* or abuse-deterren\*)):ti,ab,kw 2404

#39 ((naloxone or antioplaz or "en 1530" or "en 15304" or en1530 or en15304 or evzio or maloxone or mapin or "MRZ 2593-Br" or "MRZ-2593" or nalone or nalonee or nalone or naloxon curamed or naloxon-ratiopharm or naloxona or narkan or narkanti or narcon or narvcam or naxone or zynox) near/3 (maintenance\* or substitut\* or replac\* or rehabilit\* or detox\* or therap\* or pharmacotherap\* or pharmaco-therap\* or treatment\* or abuse-deterren\*)):ti,ab,kw 542

#40 ((naltrexone or antaxon or antaxone or celupan or "en 1639a" or en1639a or nalerona or nalorex or naltrel or naltrexone hydrochloride or nemexin or nodict or nutrexon or phaltrexia or "re-via" or regental or revez or revia or trexan or vivitrex or vivitrol) near/3 (maintenance\* or substitut\* or replac\* or rehabilit\* or detox\* or therap\* or pharmacotherap\* or pharmaco-therap\* or treatment\* or abuse-deterren\*)):ti,ab,kw 754

#41 (((drug\* near/2 dependen\*) or (drug\* near/2 addict\*) or (substance\* near/2 dependen\*) or (substance\* near/2 addict\*)) near/3 (treatment\* or therap\* or pharmacotherap\* or pharmaco-therap\*)):ti,ab,kw 1529

#42 (maintenance near/2 (treatment\* or therap\* or pharmacotherap\* or pharmaco-therap\*)):ti,ab,kw 7632

#43 detoxif\*:ti,ab,kw 1453

#44 {or #17-#43} 19190

#45 #16 and #44 4477

#46 #4 or #45 4693

#47 [mh Child] not ([mh Adolescent] or [mh Adult]) 134

#48 [mh Infant] not ([mh Adolescent] or [mh Adult]) 14132

|     |                                                           |        |       |
|-----|-----------------------------------------------------------|--------|-------|
| #49 | #46 not (#47 or #48)                                      | 4649   |       |
| #50 | conference abstract:pt Publication Year from 2016 to 2018 |        | 39970 |
| #51 | #49 and #50                                               | 97     |       |
| #52 | conference abstract:pt                                    | 102123 |       |
| #53 | #49 not #52 in Trials                                     | 4140   |       |
| #54 | #53 or #51 in Trials                                      | 4237   |       |

### **Appendix 3: Definitions of Interventions and Comparators**

Provided below are descriptions of the a priori list of psychosocial interventions for which we anticipate finding study data and which are considered of clinical relevance for the planned knowledge syntheses. Other interventions may also be encountered during the review and will be discussed by the research team for relevance as they are encountered. When needed, psychosocial interventions which are not labelled using a known terminology or which are different in administration than the core descriptions of these interventions will also be reviewed for relevance by the research team.

#### **Active Control Groups**

1. ***Standard Care***: “the typical standard of care in pharmacological maintenance treatments already includes some form of psychosocial counselling.[1]”
2. ***Medical Management***: “medically-focused, informal counselling that includes, but is not limited to, health and mental wellness checks, offering non-judgmental support and advice, assessing motivation and exploring barriers to change, developing a holistic treatment plan, promoting alternative strategies for managing stress, and providing referrals to health and social services when requested or appropriate.[2]”

#### **Psychosocial Interventions**

##### *Individual Interventions*

1. ***Acceptance and Commitment Therapy***: “This therapy views psychological events as ongoing actions of the whole organism interacting in and with historically and situationally defined contexts. From an ACT perspective, a major problem of clients lays

in their limited and inflexible sources of the behaviors. The patients devote most of their time and energy to flee from personal and uncomfortable experiences. This keeps them from being engaged in life activities.” ACT sessions may include: creative despair, exploring discrepancies between control strategies and values, mindfulness training, exposure to internal stimuli, and discussing action plans.[3]

2. ***Cognitive Behavioral Therapy***: “This therapy is a short-term present focused therapy oriented towards focusing on current problems and helping to teach clients to adjust unhelpful thinking patterns.” “The main components of this [therapy] focus on performing a functional analysis of behaviour, promoting behavioral activation, identifying and coping with drug cravings, enhancing drug-refusal skills, enhancing decision-making about high-risk situations, and improving problem-solving skills.[4]”
3. ***Contingency Management (i.e., medication, prize, or monetary equivalent reinforcement)***: Behavioural treatment based on positive/negative reinforcers used to promote abstinence in participants in treatment. With positive reinforcers, the participants can obtain payment or other types of rewards for drug-free urine or methadone dose increases.[5]
4. ***Community Reinforcement***: Behavioural approach to promote abstinence. “During sessions, participants are provided with relationship and employment counselling, instructions on antecedents and consequences of their opiate use, assistance in developing new or reinitiating old recreational activities, and are connected to other community resources if needed. Significant others are also often mobilized to administer reinforcers contingent on non-substance using behavior of the patient.[5]”



5. ***Dialectical Behavior Therapy***: “Applies directive, problem-oriented techniques that are balanced with supportive techniques, such as reflection, empathy, acceptance and emphasis on the client’s inherent ability to access an internal ‘wise mind.’ In addition, dialectical strategies are employed, including balancing acceptance with change, alternating validation with problem solving and using paradox and metaphor. Individual DBT targets dysfunctional behaviors in hierarchical order (suicidal, therapy-interfering, substance use, and quality-of-life interfering behaviors) and replaces those behaviors with skillful behaviors learned from psycho-educational skills.[6]”
6. ***Drug Counselling, General Counselling, and Supportive Counselling***: “Provides general education, support and encouragement for abstinence oriented behaviours without using direct coping skills training.[2]”
7. ***Motivational Interviewing***: A non-confrontational, goal-oriented process designed to improve readiness to consider behaviour change and help clients resolve ambivalence towards change.[7]

### ***Couples Interventions***

1. ***Behavioural Couples Therapy***: “Understands couple problems based on social exchange theory (i.e., that the success of a relationship depends on the frequency and variety of positive behaviours that are reciprocated). Treatment emphasizes partners’ specification (objectification) of desired positive changes from their partner, with various reinforcements of desired behaviour change, leading to behavioural exchanges.[8]”
2. ***Cognitive-Behavioural Couples Therapy***: Time-limited therapy that involves the couple. Therapy is relatively structured and involves goal setting. A functional analysis is often

done to assesses maladaptive affective and instrumental behaviours and the environmental contingencies supporting these behaviours, and the ways in which the couple's reciprocal interactions affect their relational satisfaction. Based on the functional analysis, the therapist and couple together delineate specific treatment goals which often involve increasing exchanges of positive behaviours and improving communication skills that influence the interaction process within the couple.[8]"

3. ***Emotion- Focused Couples Therapy:*** "Adheres to humanistic-experiential therapy principles: (1) The therapeutic alliance can itself be healing; (2) the inherent validity of the patient's experience is central to change, and is fostered by the therapist's authenticity and transparency; (3) given the opportunity to do so, people have the ability to make healthy choices; (4) both the inner and outer realities of people's lives need to be attended to; and (5) therapy can provide opportunities for direct, in- session, corrective emotional experiences. Central attention is given to the role of emotion to break maladaptive, repetitive cycles of couple interaction.[8]"

### ***Family Interventions***

1. ***Family Therapy:*** "A structured and strategic approach which places particular emphasis on developing appropriate boundaries and limits before introducing a strategic intervention. Family members are also invited to attend some sessions.[5]"
2. ***Behavioural Family Therapy:*** "Based on social learning theory and behaviour exchange principles derived from classical and operant conditioning approaches." This therapy aims to improve interactions between family members through reinforcement of desired behaviour change.[8]"

3. ***Cognitive-Behavioural Family Therapy:*** Time-limited therapy that involves the whole family, or subgroups of the family. Therapy is relatively structured and involves goal setting. A functional analysis is often done to assess maladaptive affective and instrumental behaviours and the environmental contingencies supporting these behaviours, and the ways in which family members' reciprocal interactions affect their relational satisfaction. Based on the functional analysis, the therapist and family together delineate specific treatment goals which often involve increasing exchanges of positive behaviours and improving communication skills that influence the interaction process within the family.[8]"
4. ***Emotion- Focused Family Therapy:*** Family-delivered format of emotion focused therapy. "Adheres to humanistic– experiential therapy principles: (1) The therapeutic alliance can itself be healing; (2) the inherent validity of the patient's experience is central to change, and is fostered by the therapist's authenticity and transparency; (3) given the opportunity to do so, people have the ability to make healthy choices; (4) both the inner and outer realities of people's lives need to be attended to; and (5) therapy can provide opportunities for direct, in-session, corrective emotional experiences. Central attention is given to the role of emotion to break maladaptive, repetitive cycles of couple interaction.[8]"
5. ***Multi-Dimensional Family Therapy:*** "An empirically supported, manualized, family intervention for adolescent substance use and related mental health problems. It intervenes in four domains: (1) adolescent, (2) parent(s), (3) family interaction, and (4) extrafamilial social systems. Treatment is phasic, interventions are individualized, case

formulations are revised on the basis of feedback, and therapists advocate for both the adolescent and the parent.[8]”

### ***Group Interventions***

1. ***12-Step Facilitation Group***: Narcotics Anonymous (NA) meetings are part of a self-help, peer-group that supports people who use drugs. NA is structured from the basic principles of alcoholics anonymous (AA) groups, where members are encouraged to learn from one-another to live drug-free.
2. ***Acceptance and Commitment Therapy***: Group-delivered format of acceptance and commitment therapy. “This therapy views psychological events as ongoing actions of the whole organism interacting in and with historically and situationally defined contexts. From an ACT perspective, a major problem of patients lays in their limited and inflexible sources of the behaviors. The clients devote most of their time and energy to flee from personal and uncomfortable experiences. This keeps them from being engaged in life activities.” ACT sessions may include: creative despair, exploring discrepancies between control strategies and values, mindfulness training, exposure to internal stimuli, and discussing action plans.[3]
3. ***Cognitive Behavioural Group Therapy***: Group-delivered format of cognitive behavioural therapy. “This therapy is a short-term present focused therapy oriented towards focusing on current problems and helping to teach clients to adjust unhelpful thinking.” “The main components of counselling focus on performing a functional analysis of behaviour, promoting behavioural activation, identifying and coping with drug cravings, enhancing

drug-refusal skills, enhancing decision-making about high-risk situations, and improving problem-solving skills.[4]”

4. ***Dialectical Behavior Group Therapy***: Group-delivered format of dialectical behavior therapy. “Applies directive, problem-oriented techniques that are balanced with supportive techniques, such as reflection, empathy, acceptance and emphasis on the client’s inherent ability to access an internal ‘wise mind.’ In addition, dialectical strategies are employed, including balancing acceptance with change, alternating validation with problem solving and using paradox and metaphor.[6]” Group DBT can target dysfunctional behaviours, as is consistent with individual DBT, however, it can also be in the format of a DBT skills-training group which can target skills such as mindfulness, interpersonal effectiveness and emotion regulation.
5. ***Mindfulness Group Therapy***: Group-delivered mindfulness techniques. “Mindfulness is a technique comprised of meditation and a specific mental tendency toward experience that encourages an awareness of the present-moment experience.” Sessions included: meditation techniques, identifying triggers and cravings through mindfulness, mindfulness in high-risk situations, acceptance and skillful action, seeing thoughts as thoughts, self-care, and social support practices.[9]
6. ***Group Motivational Interviewing***: Group-delivered format of motivational interviewing. A non-confrontational, goal-oriented process designed to improve readiness to consider behaviour change and help clients resolve ambivalence towards change.[7]

## References

1. Veilleux JC, Colvin PJ, Anderson J, et al. A review of opioid dependence treatment: pharmacological and psychosocial interventions to treat opioid addiction. *Clinical Psychology Review* 2010;30:155-66.
2. British Columbia Centre on Substance Use, British Columbia Ministry of Health. A Guideline for the Clinical Management of Opioid Use Disorder. 2017. Accessed on 15/Jan/2018. Available from: [http://www.bccsu.ca/wp-content/uploads/2017/06/BC- OUD-Guidelines\\_June2017.pdf](http://www.bccsu.ca/wp-content/uploads/2017/06/BC- OUD-Guidelines_June2017.pdf)
3. Saedy M, Kooshki S, Jamali Firouzabadi M, et al. Effectiveness of Acceptance-Commitment Therapy on Anxiety and Depression among Patients on Methadone Treatment: A Pilot Study. *Iranian Journal of Psychiatry and Behavioral Sciences* 2015;9:e222.
4. Moore BA, Fiellin DA, Cutter CJ, et al. Cognitive Behavioral Therapy Improves Treatment Outcomes for Prescription Opioid Users in Primary Care Buprenorphine Treatment. *Journal of Substance Abuse Treatment* 2016;71:54-7.
5. Amato L, Minozzi S, Davoli M, et al. Psychosocial combined with agonist maintenance treatments versus agonist maintenance treatments alone for treatment of opioid dependence. *The Cochrane Database of Systematic Reviews* 2011:CD004147.
6. Linehan MM, Dimeff LA, Reynolds SK, et al. Dialectical behavior therapy versus comprehensive validation therapy plus 12-step for the treatment of opioid dependent women meeting criteria for borderline personality disorder. *Drug and Alcohol Dependence* 2002;67:13-26.

7. Nyamathi A, Shoptaw S, Cohen A, et al. Effect of motivational interviewing on reduction of alcohol use. *Drug and Alcohol Dependence* 2010;107:23-30.
8. Messer SB, Gurman AS. Essential Psychotherapies: Theory and Practice. Guilford Press, New York 2011.
9. Imani S, Atef Vahid MK, Gharraee B, et al. Comparing Mindfulness-Based Group Therapy With Treatment as Usual for Opioid Dependents: A Pilot Randomized Clinical Trial Study Protocol. *Iranian Journal of Psychiatry and Behavioral Sciences* 2015;9:e216.
